# Supplementary material for: Hierarchical porous CuO nanostructures with tunable properties for high performance supercapacitors
Source: Royal Society of Chemistry journal article supplement (doi:10.1039/c4ra16924g), 2015-01-01

## Supporting information

### Vilsmeier Cyclization of $\alpha$ -Acetyl- $\alpha$ -aroyl Ketene-*N*, *S*-Acetals:

### Direct and Efficient Synthesis of Halogenated Pyridin-2(1*H*)-ones

Haifeng Yu\*<sup>a</sup>, Yongmei Zhang<sup>a</sup>, Tiechun Li<sup>a</sup>, Peiqiu Liao\*<sup>b</sup>, Quanping Diao<sup>a</sup>, Guang Xin<sup>a</sup>, Qingling Meng<sup>a</sup>, Dongyan Hou<sup>a</sup>

<sup>a</sup> School of Chemistry and Life Science, Anshan Normal University, Anshan, Liaoning 114007, China

<sup>b</sup> Department of Chemistry, Northeast Normal University, Changchun, Jilin 130024, China  
E-mail: yuhf68105@sina.com

### Contents:

|                                            |     |
|--------------------------------------------|-----|
| 1. General Considerations                  | S2  |
| 2. Experimental procedures                 | S2  |
| 3. Analytical data                         | S4  |
| 4. Copies of NMR spectra for new compounds | S16 |

## 1. General Considerations

All the manipulations of air-and/or moisture-sensitive compounds were carried out under a nitrogen atmosphere using standard Schlenk techniques. Reaction solvents were dried and distilled prior to use by the literature methods.  $^1\text{H}$  and  $^{13}\text{C}\{^1\text{H}\}$  NMR spectra were recorded on a Bruker DRX-600 spectrometer and all chemical shift values refer to  $\delta$  TMS = 0.00 ppm or  $\text{CDCl}_3$  ( $\delta$  ( $^1\text{H}$ ), 7.26 ppm;  $\delta$  ( $^{13}\text{C}$ ), 77.16 ppm). The HRMS analysis was achieved on Bruker microTof by using ESI method. All the melting points were uncorrected. Analytical TLC plates, Sigma-Aldrich silica gel 60F200 were viewed by UV light (254 nm). Chromatographic purifications were performed on SDZF silica gel 160.

## 2. Experimental procedures

### (1) Typical procedure for the preparation of $\alpha$ -acetyl- $\alpha$ -aroyl ketene-*N*, *S*-acetals **1a-k**

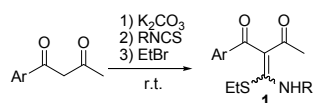

$\text{K}_2\text{CO}_3$  (5.0 mmol) was added to a stirred solution of 1-arylbutane-1, 3-dione (5.0 mmol) in DMF (10 mL), and the mixture was stirred for 1 h at room temperature. The isothiocyanate (5.0 mmol) was then added dropwise, and the mixture was stirred for 2 h at room temperature. The bromoethane (5.0 mmol) and  $\text{K}_2\text{CO}_3$  (5.0 mmol) was added. The reaction was quenched with 100 mL of  $\text{H}_2\text{O}$  after the mixture was further stirred 4 h at room temperature. The resulting mixture was extracted with dichloromethane ( $3 \times 30$  mL), and the combined organic phase was washed with water, dried over anhydrous  $\text{MgSO}_4$ , filtered, and evaporated in vacuo. The crude product was purified by silica gel chromatography (petroleum ether (30-60  $^\circ\text{C}$ ) /diethyl ether=30:1, v/v) to give  $\alpha$ -acetyl- $\alpha$ -aroyl ketene-*N*, *S*-acetals **1a-k**.

### (2) Typical procedure for the preparation of $\alpha$ -acetyl-*N*, *S*-acetals **1l**

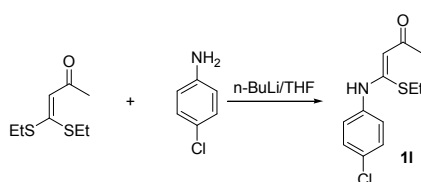

To a stirred solution of 4-chlorobenzenamine (635 mg, 5 mmol) in dry THF (20 mL) was added *n*-BuLi (2.6 mL, 6 mmol) under nitrogen atmosphere over a period of 10 min at -78 °C. The reaction mixture was brought to room temperature and further stirred for 45 min. A solution of 4, 4-bis(ethylthio)but-3-en-2-one (900 mg, 5 mmol) in dry THF (10 mL) was added at 0 °C, and the reaction mixture was further stirred at room temperature for 2 h. It was refluxed for 18-20 h to complete the reaction, cooled, poured into saturated NH<sub>4</sub>Cl solution (50 mL), and extracted with CHCl<sub>3</sub> (3×15 mL). The combined extracts were washed with water and brine, dried (Na<sub>2</sub>SO<sub>4</sub>), and evaporated to give crude product which was purified by silica gel chromatography (petroleum ether/ethyl acetate=6:1, v/v) to give **11** in 77% yield as a white solid.

### (3) Typical Procedure for the Synthesis of 5-aryl-4-halo-3-formyl pyridin-2(1H)-ones **2**

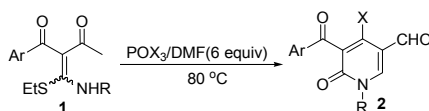

The Vilsmeier reagent was prepared by adding POX<sub>3</sub>/DMF (1.5 mmol) into icecold dry DMF (1 mL) under stirring. The mixture was then stirred for 15 min at 0 °C. To the above Vilsmeier reagent was added **1** (0.25 mmol) as a solution in DMF (1 mL). The mixture was heated to 80 °C and stirred for 4.0 h. After cooling to room temperature, the resulting mixture was poured into saturated aqueous NaCl (100 mL), which was extracted with dichloromethane (3×30 mL). The combined organic phase was washed with water, dried over anhydrous MgSO<sub>4</sub>, filtered, and evaporated in vacuo. The crude product was purified by silica gel chromatography (petroleum ether/ethyl acetate=4:1, v/v) to give **2** as a white solid.

### (4) X-ray crystallographic studies

Single crystal X-ray diffraction data of compounds (*Z*)-**1a** were recorded on a Bruker SMART APEX II diffractometer with graphite-monochromated Mo K  $\alpha$  radiation ( $\lambda = 0.71073 \text{ \AA}$ ) at 293K. Cell parameters were obtained by global refinement of the positions of all collected reflections. Intensities were corrected for Lorentz and polarization effects and empirical absorption. The structures were solved by direct methods and refined by full-matrix least squares on *F*<sup>2</sup>. All non-hydrogen

atoms were refined with anisotropic temperature parameters. All hydrogen atoms on carbon atoms were generated geometrically. Structure solution and refinement were performed by using the SHELXL-97 program. The X-ray crystallographic files, in CIF format, are available from the Cambridge Crystallographic Data Centre on quoting the deposition numbers CCDC 974611 for (*Z*)-**1a**. Copies of this information may be obtained free of charge from The Director, CCDC, 12 Union Road, Cambridge CB21EZ, UK (Fax: +44-1223-336033; e-mail: [deposit@ccdc.cam.ac.uk](mailto:deposit@ccdc.cam.ac.uk) or www: <http://www.ccdc.cam.ac.uk>).

### 3 Analytical data

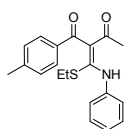

**(Z)-2-(ethylthio(phenylamino)methylene)-1-*p*-tolylbutane-1, 3-dione ((Z)-1a):** yield 85%. Yellowish crystalline solid. M.p.: 58-59 °C. <sup>1</sup>H NMR (600 MHz, CDCl<sub>3</sub>) δ: 13.06 (s, 1H), 7.88 (d, *J* = 7.9 Hz, 2 H), 7.40 (d, *J* = 8.0 Hz, 2 H), 7.35 (t, 2 H), 7.27 (d, *J* = 7.9 Hz, 2 H), 7.21 (t, 1 H), 2.43 (s, 3 H), 2.21 (q, 2 H), 2.07 (s, 3 H), 0.88 (t, 3 H). <sup>13</sup>C NMR (150 MHz, CDCl<sub>3</sub>) δ: 195.9, 194.1, 158.6, 143.9, 138.9, 137.1, 129.5 (2C), 129.4 (2 C), 129.2 (2 C), 125.9, 124.3 (2 C), 116.3, 29.0, 28.0, 21.7, 14.0. HRMS Calcd for C<sub>20</sub>H<sub>21</sub>NO<sub>2</sub>S: ([M+H]<sup>+</sup>) 340.1366; Found: 340.1366.

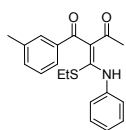

**(Z)-2-(ethylthio(phenylamino)methylene)-1-*m*-tolylbutane-1, 3-dione ((Z)-1b):** yield 86%. Yellowish liquid. <sup>1</sup>H NMR (600 MHz, CDCl<sub>3</sub>) δ 13.07 (s, 1 H), 7.80 (s, 1 H), 7.76 (d, *J* = 7.4 Hz, 1 H), 7.40 (d, *J* = 8.1 Hz, 2 H), 7.37-7.33 (m, 4 H), 7.20 (t, 1 H), 2.42 (s, 3 H), 2.20 (q, 2 H), 2.08 (s, 3 H), 0.86 (t, 3 H). <sup>13</sup>C NMR (150 MHz, CDCl<sub>3</sub>) δ 196.3, 194.2, 158.9, 139.8, 138.9, 138.5, 133.8, 129.7, 129.3 (2C), 128.5, 126.7, 126.0, 124.3 (2C), 116.4, 29.0, 28.1, 21.4, 14.0. HRMS Calcd for C<sub>20</sub>H<sub>21</sub>NO<sub>2</sub>S: ([M+H]<sup>+</sup>) 340.1366; Found: 340.1380.

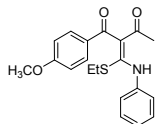

**(Z)-2-(ethylthio(phenylamino)methylene)-1-(4-methoxyphenyl)butane-1, 3-dione**

**((Z)-1c):** yield 84%. Yellowish crystalline solid. M.p.: 68-69 °C. <sup>1</sup>H NMR (600 MHz, CDCl<sub>3</sub>) δ 13.03 (s, 1 H), 7.97 (d, *J* = 8.6 Hz, 2 H), 7.40 (d, *J* = 8.0 Hz, 2 H), 7.35 (t, 2 H), 7.20 (t, 1 H), 6.96 (d, *J* = 8.4 Hz, 2 H), 3.88 (s, 3 H), 2.23 (q, 2 H), 2.07 (s, 3 H), 0.90 (t, 3 H). <sup>13</sup>C NMR (150 MHz, CDCl<sub>3</sub>) δ 195.0, 194.0, 163.7, 158.4, 139.1, 132.6, 131.8 (2 C), 129.3 (2 C), 126.0, 124.3 (2 C), 116.3, 114.0 (2 C), 55.6, 29.0, 28.0, 14.2. HRMS Calcd for C<sub>20</sub>H<sub>21</sub>NO<sub>3</sub>S: ([M+H]<sup>+</sup>) 356.1315; Found: 356.1320.

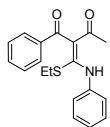

**(Z)-2-(ethylthio(phenylamino)methylene)-1-phenylbutane-1, 3-dione ((Z)-1d):**

yield 88%. Yellowish crystalline solid. M.p.: 66-67 °C. <sup>1</sup>H NMR (600 MHz, CDCl<sub>3</sub>) δ 13.08 (s, 1 H), 7.97 (d, *J* = 7.3 Hz, 2 H), 7.55 (t, 1 H), 7.46 (t, 2 H), 7.39 (d, *J* = 7.8 Hz, 2 H), 7.34 (t, 2 H), 7.20 (t, 1 H), 2.20 (q, 2 H), 2.09 (s, 3 H), 0.84 (t, 3 H). <sup>13</sup>C NMR (150 MHz, CDCl<sub>3</sub>) δ 196.1, 194.2, 159.1, 140.0, 139.0, 132.9, 129.3 (4 C), 128.7 (2 C), 126.1, 124.4 (2 C), 116.2, 29.1, 28.1, 14.0. HRMS Calcd for C<sub>19</sub>H<sub>19</sub>NO<sub>2</sub>S: ([M+H]<sup>+</sup>) 326.1210; Found: 326.1214.

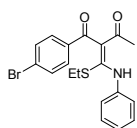

**(Z)-1-(4-bromophenyl)-2-(ethylthio(phenylamino)methylene)butane-1, 3-dione**

**((Z)-1e):** yield 90%. Yellowish crystalline solid. M.p.: 37-38 °C. <sup>1</sup>H NMR (600 MHz, CDCl<sub>3</sub>) δ 13.11 (s, 1 H), 7.83 (d, *J* = 8.5 Hz, 2 H), 7.60 (d, *J* = 8.5 Hz, 2 H), 7.39-7.34 (m, 4 H), 7.21 (t, 1 H), 2.20 (q, 2 H), 2.09 (s, 3 H), 0.86 (t, 3 H). <sup>13</sup>C NMR (150 MHz, CDCl<sub>3</sub>) δ 195.0, 194.0, 159.4, 138.8, 138.7, 132.0 (2 C), 130.8 (2 C), 129.3 (2 C), 128.0, 126.3, 124.4 (2 C), 115.6, 29.0, 28.2, 14.0. HRMS Calcd for C<sub>19</sub>H<sub>18</sub>BrNO<sub>2</sub>S: ([M+H]<sup>+</sup>) 404.0315; Found: 404.0311.

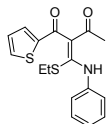

**(Z)-2-(ethylthio(phenylamino)methylene)-1-(thiophen-2-yl)butane-1, 3-dione ((Z)-1f):** yield 86%. Yellowish liquid.  $^1\text{H}$  NMR (600 MHz,  $\text{CDCl}_3$ )  $\delta$  13.02 (s, 1 H), 7.68 (t, 2 H), 7.39 (d,  $J = 7.5$  Hz, 2 H), 7.35 (t, 2 H), 7.21 (t, 1 H), 7.14 (t, 1 H), 2.50 (q, 2 H), 2.14 (s, 3 H), 0.92 (t, 3 H).  $^{13}\text{C}$  NMR (150 MHz,  $\text{CDCl}_3$ )  $\delta$  193.5, 188.2, 158.8, 147.2, 138.7, 134.4, 133.4, 129.2 (2 C), 128.2, 126.1, 124.3 (2 C), 120.1, 28.7, 28.2, 14.0. HRMS Calcd for  $\text{C}_{17}\text{H}_{17}\text{NO}_2\text{S}_2$ : ( $[\text{M}+\text{H}]^+$ ) 332.0774; Found: 332.0793.

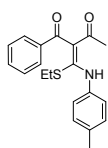

**(Z)-2-((p-toluidino)(ethylthio)methylene)-1-phenylbutane-1, 3-dione ((Z)-1g):** yield 83%. Yellowish crystalline solid. M.p.: 61-62 °C.  $^1\text{H}$  NMR (600 MHz,  $\text{CDCl}_3$ )  $\delta$  (Z)-1g: 13.09 (s, 1 H), 7.96 (d,  $J = 7.6$  Hz, 2 H), 7.56 (t, 1 H), 7.47 (t, 2 H), 7.27 (d,  $J = 7.4$  Hz, 2 H), 7.15 (d,  $J = 7.9$  Hz, 2 H), 2.34 (s, 3 H), 2.20 (q, 2 H), 2.08 (s, 3 H), 0.84 (t, 3 H).  $^{13}\text{C}$  NMR (150 MHz,  $\text{CDCl}_3$ )  $\delta$  196.3, 194.0, 159.6, 140.0, 136.2, 136.0, 132.9, 129.9 (2 C), 129.3 (2 C), 128.6 (2 C), 124.3 (2 C), 115.8, 29.0, 28.1, 21.1, 14.0. (HRMS Calcd for  $\text{C}_{20}\text{H}_{21}\text{NO}_2\text{S}$ : ( $[\text{M}+\text{H}]^+$ ) 340.1366; Found: 340.1370.

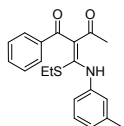

**(Z)-2-((m-toluidino)(ethylthio)methylene)-1-phenylbutane-1, 3-dione ((Z)-1h):** yield 85%. Yellowish liquid.  $^1\text{H}$  NMR (600 MHz,  $\text{CDCl}_3$ )  $\delta$  13.07 (s, 1 H), 7.97 (d,  $J = 7.4$  Hz, 2 H), 7.55 (t, 1 H), 7.46 (t, 2 H), 7.21 (t, 2 H), 7.19 (s, 1 H), 7.01 (d,  $J = 7.5$  Hz, 1 H), 2.34 (s, 3 H), 2.22 (q, 2 H), 2.08 (s, 3 H), 0.85 (t, 3 H).  $^{13}\text{C}$  NMR (150 MHz,  $\text{CDCl}_3$ )  $\delta$  196.2, 194.1, 159.3, 139.9, 139.3, 138.8, 132.9, 129.3 (2 C), 129.1, 128.6 (2 C), 126.9, 124.9, 121.3, 116.0, 29.0, 28.1, 21.4, 14.0. HRMS Calcd for  $\text{C}_{20}\text{H}_{21}\text{NO}_2\text{S}$ : ( $[\text{M}+\text{H}]^+$ ) 340.1366; Found: 340.1385.

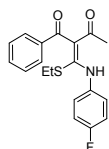

**(Z)-2-(ethylthio(4-fluorophenylamino)methylene)-1-phenylbutane-1, 3-dione ((Z)-1i):** yield 75%. Yellowish liquid.  $^1\text{H}$  NMR (600 MHz,  $\text{CDCl}_3$ )  $\delta$  13.01 (s, 1 H), 7.96 (d,  $J = 8.3$  Hz, 2 H), 7.56 (t, 1 H), 7.47 (t, 2 H), 7.36-7.34 (m, 2 H), 7.05 (t, 2 H), 2.20 (q, 2 H), 2.09 (s, 3 H), 0.85 (t, 3 H).  $^{13}\text{C}$  NMR (150 MHz,  $\text{CDCl}_3$ )  $\delta$  196.1, 194.4, 161.6, 160.0, 159.2, 139.9, 133.1, 129.3 (2C), 128.7 (2 C), 126.4, 126.3, 116.4, 116.3, 116.1, 29.1, 28.2, 14.0. HRMS Calcd for  $\text{C}_{19}\text{H}_{18}\text{FNO}_2\text{S}$ : ( $[\text{M}+\text{H}]^+$ ) 344.1115; Found: 344.1119.

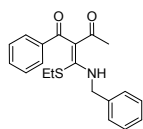

**(Z)-2-((benzylamino)(ethylthio)methylene)-1-phenylbutane-1, 3-dione ((Z)-1j):** yield 87%. Yellowish crystalline solid. M.p.: 61-62 °C.  $^1\text{H}$  NMR (600 MHz,  $\text{CDCl}_3$ )  $\delta$  12.16 (s, 1 H), 7.90 (d,  $J = 7.9$  Hz, 2 H), 7.54 (t, 1 H), 7.44 (t, 2 H), 7.37 (t, 2 H), 7.30 (d,  $J = 7.2$  Hz, 3 H), 4.77 (d,  $J = 5.8$  Hz, 2 H), 2.62 (q, 2 H), 2.09 (s, 3 H), 1.00 (t, 3 H).  $^{13}\text{C}$  NMR (150 MHz,  $\text{CDCl}_3$ )  $\delta$  196.2, 193.8, 162.6, 140.3, 137.3, 132.5, 129.1 (2 C), 128.8 (2 C), 128.4 (2 C), 127.6, 126.9 (2 C), 114.35, 48.9, 30.4, 28.6, 14.2. HRMS Calcd for  $\text{C}_{20}\text{H}_{21}\text{NO}_2\text{S}$ : ( $[\text{M}+\text{H}]^+$ ) 340.1366; Found: 340.1378.

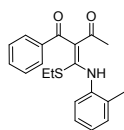

**(Z)-2-((o-toluidino)(ethylthio)methylene)-1-phenylbutane-1, 3-dione ((Z)-1k):** yield 87%. Yellowish liquid.  $^1\text{H}$  NMR (600 MHz,  $\text{CDCl}_3$ )  $\delta$  13.08 (s, 1 H), 7.97 (d,  $J = 7.4$  Hz, 2 H), 7.55 (t, 1 H), 7.46 (t, 3 H), 7.22 (d,  $J = 7.3$  Hz, 1 H), 7.19-7.13 (m, 2 H), 2.37 (s, 3 H), 2.17 (q, 2 H), 2.11 (s, 3 H), 0.83 (t, 3 H).  $^{13}\text{C}$  NMR (150 MHz,  $\text{CDCl}_3$ )  $\delta$  196.2, 194.1, 160.7, 140.1, 137.6, 132.9, 132.8, 130.9, 129.3 (2 C), 128.6 (2 C), 126.6, 126.5, 125.5, 115.8, 28.9, 28.1, 18.2, 14.0. HRMS Calcd for  $\text{C}_{20}\text{H}_{21}\text{NO}_2\text{S}$ : ( $[\text{M}+\text{H}]^+$ ) 340.1366; Found: 340.1382.

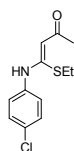

**(Z)-4-(4-chlorophenylamino)-4-(ethylthio)but-3-en-2-one 1I:** yield 76%. White crystalline solid, M.p.: 68-69 °C. <sup>1</sup>H NMR (600 MHz, CDCl<sub>3</sub>) δ 12.93 (s, 1 H), 7.30 (d, *J* = 8.8 Hz, 2 H), 7.19 (d, *J* = 8.6 Hz, 2 H), 5.26 (s, 1 H), 2.84 (q, 2 H), 2.13 (s, 3 H), 1.32 (t, 3 H). <sup>13</sup>C NMR (150 MHz, CDCl<sub>3</sub>) δ 193.4, 164.5, 137.1, 131.7, 129.2 (2 C), 126.6 (2 C), 93.1, 29.4, 26.1, 13.4. HRMS Calcd for C<sub>12</sub>H<sub>14</sub>ClNOS: ([M+H]<sup>+</sup>) 256.0557; Found: 256.0553.

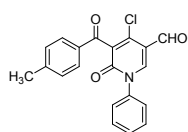

**4-chloro-5-(4-methylbenzoyl)-6-oxo-1-phenyl-1,6-dihydropyridine-3-carbaldehyde 2a:** yield 85%. White solid. M.p.: 160-161 °C. <sup>1</sup>H NMR (600 MHz, CDCl<sub>3</sub>) δ 10.14 (s, 1 H), 8.30 (s, 1 H), 7.85 (d, *J* = 8.2 Hz, 2 H), 7.53-7.48 (m, 3 H), 7.40 (d, *J* = 8.5 Hz, 2 H), 7.29 (d, *J* = 8.0 Hz, 2 H), 2.43 (s, 3 H). <sup>13</sup>C NMR (150 MHz, CDCl<sub>3</sub>) δ 190.3, 185.6, 158.6, 145.8, 143.8, 143.2, 138.6, 133.1, 130.0, 129.9 (3 C), 129.8 (2 C), 129.7 (2 C), 126.3 (2 C), 114.5, 22.0. HRMS Calcd for C<sub>20</sub>H<sub>14</sub>ClNO<sub>3</sub>: ([M+H]<sup>+</sup>) 352.0735; Found: 352.0739.

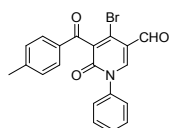

**4-bromo-5-(4-methylbenzoyl)-6-oxo-1-phenyl-1,6-dihydropyridine-3-carbaldehyde 2b:** yield 81%. White solid. M.p.: 173-174 °C. <sup>1</sup>H NMR (600 MHz, CDCl<sub>3</sub>) δ 10.10 (s, 1 H), 8.26 (s, 1 H), 7.85 (d, *J* = 8.2 Hz, 2 H), 7.53-7.48 (m, 3 H), 7.40 (d, *J* = 8.5 Hz, 2 H), 7.29 (d, *J* = 8.0 Hz, 2 H), 2.43 (s, 3 H). <sup>13</sup>C NMR (150 MHz, CDCl<sub>3</sub>) δ 191.2, 187.5, 158.2, 145.7, 143.3 (2 C), 138.6, 133.0, 132.8, 132.6, 129.8 (2 C), 129.7 (2 C), 129.6 (2 C), 126.1 (2 C), 115.0, 22.0. HRMS Calcd for C<sub>20</sub>H<sub>14</sub>BrNO<sub>3</sub>: ([M+H]<sup>+</sup>) 396.0230; Found: 396.0218.



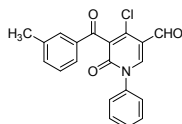

**4-chloro-5-(3-methylbenzoyl)-6-oxo-1-phenyl-1,6-dihydropyridine-3-carbaldehyde 2c:** yield 82%. Yellowish solid. M.p.: 171-172 °C.  $^1\text{H}$  NMR (600 MHz,  $\text{CDCl}_3$ )  $\delta$  10.18 (s, 1 H), 8.34 (s, 1H), 7.80 (s, 1 H), 7.55 (d,  $J = 7.7$  Hz, 1 H), 7.57-7.52 (m, 3 H), 7.47 (d,  $J = 7.4$  Hz, 1 H), 7.45-7.40 (m, 3 H), 2.45 (s, 3 H).  $^{13}\text{C}$  NMR (150 MHz,  $\text{CDCl}_3$ )  $\delta$  190.9, 185.5, 158.5, 143.7, 143.2, 139.0, 138.6, 135.5, 135.4, 129.9, 129.7 (4 C), 128.9, 126.8, 126.2 (2 C), 114.5, 21.4. HRMS Calcd for  $\text{C}_{20}\text{H}_{14}\text{ClNO}_3$ :  $([\text{M}+\text{H}]^+)$  352.0735; Found: 352.0730.

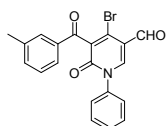

**4-bromo-5-(3-methylbenzoyl)-6-oxo-1-phenyl-1,6-dihydropyridine-3-carbaldehyde 2d:** yield 80%. Yellowish solid. M.p.: 163-164 °C.  $^1\text{H}$  NMR (600 MHz,  $\text{CDCl}_3$ )  $\delta$  10.11 (s, 1 H), 8.27 (s, 1H), 7.78 (s, 1 H), 7.74 (d,  $J = 7.7$  Hz, 1 H), 7.53-7.49 (m, 3 H), 7.44 (d,  $J = 7.5$  Hz, 1 H), 7.42-7.38 (m, 3 H), 2.42 (s, 3 H).  $^{13}\text{C}$  NMR (150 MHz,  $\text{CDCl}_3$ )  $\delta$  191.8, 187.5, 158.2, 143.4, 139.0, 138.6, 135.4, 135.0, 133.1, 132.8, 129.8, 129.7 (3 C), 129.0, 126.9, 126.1 (2 C), 115.1, 21.4. HRMS Calcd for  $\text{C}_{20}\text{H}_{14}\text{BrNO}_3$ :  $([\text{M}+\text{H}]^+)$  396.0230; Found: 396.0231.

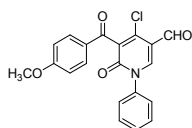

**4-chloro-5-(4-methoxybenzoyl)-6-oxo-1-phenyl-1,6-dihydropyridine-3-carbaldehyde 2e:** yield 85%. Yellowish solid. M.p.: 140-141 °C.  $^1\text{H}$  NMR (600 MHz,  $\text{CDCl}_3$ )  $\delta$  10.13 (s, 1 H), 8.29 (s, 1 H), 7.92 (d,  $J = 8.8$  Hz, 2 H), 7.53-7.48 (m, 3 H), 7.39 (d,  $J = 7.3$  Hz, 2 H), 6.96 (d,  $J = 8.8$  Hz, 2 H), 3.87 (s, 3 H).  $^{13}\text{C}$  NMR (150 MHz,  $\text{CDCl}_3$ )  $\delta$  189.3, 185.8, 165.0, 158.8, 143.9, 143.3, 138.9, 132.2 (2 C), 130.3, 130.1, 130.0 (2 C), 128.8, 126.5 (2 C), 114.8, 114.7 (2 C), 56.0. HRMS Calcd for  $\text{C}_{20}\text{H}_{14}\text{ClNO}_4$ :  $([\text{M}+\text{H}]^+)$  368.0685; Found: 368.0680.

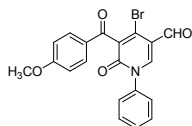

**4-bromo-5-(4-methoxybenzoyl)-6-oxo-1-phenyl-1, 6-dihydropyridine-3-carbaldehyde 2f:** yield 83%. Yellowish solid. M.p.: 96-97 °C. <sup>1</sup>H NMR (600 MHz, CDCl<sub>3</sub>) δ 10.10 (s, 1 H), 8.26 (s, 1 H), 7.92 (d, *J* = 8.8 Hz, 2 H), 7.53-7.48 (m, 3 H), 7.39 (d, *J* = 7.4 Hz, 2 H), 6.96 (d, *J* = 8.8 Hz, 2 H), 3.88 (s, 3 H). <sup>13</sup>C NMR (150 MHz, CDCl<sub>3</sub>) δ 190.0, 187.5, 164.7, 158.2, 143.3, 138.6, 133.0, 132.8, 132.0 (2 C), 129.8, 129.7 (2 C), 128.1, 126.1 (2 C), 115.0, 114.8 (2 C), 55.6. HRMS Calcd for C<sub>20</sub>H<sub>14</sub>BrNO<sub>4</sub>: ([M+H]<sup>+</sup>) 412.0180; Found: 412.0182.

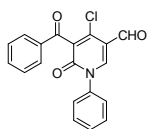

**5-benzoyl-4-chloro-6-oxo-1-phenyl-1, 6-dihydropyridine-3-carbaldehyde 2g:** yield 84%. Yellowish solid. M.p.: 138-139 °C. <sup>1</sup>H NMR (600 MHz, CDCl<sub>3</sub>) δ 10.14 (s, 1 H), 8.31 (s, 1 H), 7.95 (d, *J* = 7.5 Hz, 2 H), 7.63 (t, 1 H), 7.52-7.49 (m, 5 H), 7.39 (d, *J* = 7.3 Hz, 2 H). <sup>13</sup>C NMR (150 MHz, CDCl<sub>3</sub>) δ 190.7, 185.4, 158.5, 143.8, 143.3, 138.5, 135.4, 134.5, 129.9, 129.8 (2 C), 129.7, 129.4 (2 C), 129.1 (2 C), 126.2 (2 C), 114.5. HRMS Calcd for C<sub>19</sub>H<sub>12</sub>ClNO<sub>3</sub>: ([M+H]<sup>+</sup>) 338.0579; Found: 338.0582.

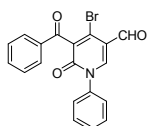

**5-benzoyl-4-bromo-6-oxo-1-phenyl-1, 6-dihydropyridine-3-carbaldehyde 2h:** yield 84%. Yellowish solid. M.p.: 148-149 °C. <sup>1</sup>H NMR (600 MHz, CDCl<sub>3</sub>) δ 10.10 (s, 1 H), 8.27 (s, 1 H), 7.96 (d, *J* = 7.4 Hz, 2 H), 7.63 (t, 1 H), 7.53-7.49 (m, 5 H), 7.39 (d, *J* = 7.4 Hz, 2 H). <sup>13</sup>C NMR (150 MHz, CDCl<sub>3</sub>) δ 191.6, 187.4, 158.2, 143.5, 138.5, 135.0, 134.5, 133.2, 132.6, 129.9, 129.7 (2 C), 129.5 (2 C), 129.1 (2 C), 126.1 (2 C), 115.0. HRMS Calcd for C<sub>19</sub>H<sub>12</sub>BrNO<sub>3</sub>: ([M+H]<sup>+</sup>) 382.0074; Found: 382.0081.

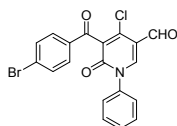

**5-(4-bromobenzoyl)-4-chloro-6-oxo-1-phenyl-1,6-dihydropyridine-3-carbaldehyde 2i:** yield 79%. Yellowish solid. M.p.: 106-107 °C. <sup>1</sup>H NMR (600 MHz, CDCl<sub>3</sub>) δ 10.13 (s, 1 H), 8.31 (s, 1 H), 7.80 (d, *J* = 8.5 Hz, 2 H), 7.64 (d, *J* = 8.5 Hz, 2 H), 7.53-7.49 (m, 3 H), 7.39 (d, *J* = 8.5 Hz, 2 H). <sup>13</sup>C NMR (150 MHz, CDCl<sub>3</sub>) δ 189.5, 185.0, 158.2, 143.8, 143.4, 138.2, 134.0, 132.2 (2 C), 130.6 (2 C), 129.8, 129.7 (2 C), 129.5, 128.8, 125.9 (2 C), 114.2. HRMS Calcd for C<sub>19</sub>H<sub>11</sub>BrClNO<sub>3</sub>: ([M+H]<sup>+</sup>) 415.9684; Found: 415.9681.

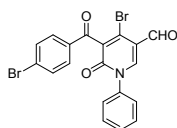

**4-bromo-5-(4-bromobenzoyl)-6-oxo-1-phenyl-1,6-dihydropyridine-3-carbaldehyde 2j:** yield 77%. Yellowish solid. M.p.: 92-93 °C. <sup>1</sup>H NMR (600 MHz, CDCl<sub>3</sub>) δ 10.10 (s, 1 H), 8.28 (s, 1 H), 7.81 (d, *J* = 8.5 Hz, 2 H), 7.65 (d, *J* = 8.5 Hz, 2 H), 7.53-7.50 (m, 3 H), 7.39 (d, *J* = 8.3 Hz, 2 H). <sup>13</sup>C NMR (150 MHz, CDCl<sub>3</sub>) δ 190.7, 187.2, 158.2, 143.7, 138.6, 133.8, 133.5, 132.5 (2 C), 130.8 (2 C), 130.0, 129.9, 129.8 (2 C), 126.1 (2 C), 115.1. HRMS Calcd for C<sub>19</sub>H<sub>11</sub>Br<sub>2</sub>NO<sub>3</sub>: ([M+H]<sup>+</sup>) 459.9179; Found: 459.9185.

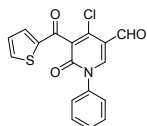

**4-chloro-6-oxo-1-phenyl-5-(thiophene-2-carbonyl)-1,6-dihydropyridine-3-carbaldehyde 2k:** yield 80%. White solid. M.p.: 115-117 °C. <sup>1</sup>H NMR (600 MHz, CDCl<sub>3</sub>) δ 10.15 (s, 1 H), 8.31 (s, 1 H), 7.78 (d, *J* = 4.9 Hz, 1 H), 7.69 (d, *J* = 3.8 Hz, 1 H), 7.54-7.50 (m, 3 H), 7.40 (d, *J* = 8.4 Hz, 2 H), 7.16 (d, *J* = 8.7 Hz, 1 H). <sup>13</sup>C NMR (150 MHz, CDCl<sub>3</sub>) δ 185.4, 182.3, 158.4, 144.0, 143.6, 142.5, 138.5, 136.1, 135.0, 129.9, 129.7 (2 C), 129.5, 128.6, 126.2 (2 C), 114.4. HRMS Calcd for C<sub>17</sub>H<sub>10</sub>ClNO<sub>3</sub>S: ([M+H]<sup>+</sup>) 344.0143; Found: 344.0143.

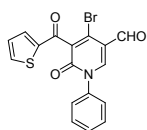

**4-bromo-6-oxo-1-phenyl-5-(thiophene-2-carbonyl)-1,6-dihydropyridine-3-carbaldehyde 2l:**

**dehyde 2l:** yield 79%. White solid. M.p.: 136-137 °C. <sup>1</sup>H NMR (600 MHz, CDCl<sub>3</sub>) δ 10.13 (s, 1 H), 8.30 (s, 1 H), 7.80 (d, *J* = 4.8 Hz, 1 H), 7.69 (d, *J* = 3.8 Hz, 1 H), 7.56-7.53 (m, 3 H), 7.44 (d, *J* = 8.3 Hz, 2 H), 7.18 (d, *J* = 8.7 Hz, 1 H). <sup>13</sup>C NMR (150 MHz, CDCl<sub>3</sub>) δ 187.4, 183.4, 158.1, 143.6, 142.1, 138.5, 136.1, 135.0, 133.5, 132.4, 129.9, 129.7 (2 C), 128.6, 126.1 (2 C), 115.0. HRMS Calcd for C<sub>17</sub>H<sub>10</sub>BrNO<sub>3</sub>S: ([M+H]<sup>+</sup>) 387.9638; Found: 387.9640.

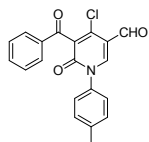

**5-benzoyl-4-chloro-6-oxo-1-p-tolyl-1,6-dihydropyridine-3-carbaldehyde 2m:** yield 85%. White solid. M.p.: 72-73 °C. <sup>1</sup>H NMR (600 MHz, CDCl<sub>3</sub>) δ 10.14 (s, 1 H), 8.30 (s, 1 H), 7.94 (d, *J* = 7.2 Hz, 2 H), 7.63 (t, 1 H), 7.50 (t, 2 H), 7.30 (d, *J* = 8.4 Hz, 2 H), 7.27 (d, *J* = 8.4 Hz, 2 H), 2.41 (s, 3 H). <sup>13</sup>C NMR (150 MHz, CDCl<sub>3</sub>) δ 190.7, 185.5, 158.6, 143.9, 143.2, 140.1, 136.0, 135.4, 134.5, 130.2 (2 C), 129.4 (2 C), 129.0 (2 C), 125.8 (2C), 114.3, 21.2. HRMS Calcd for C<sub>20</sub>H<sub>14</sub>ClNO<sub>3</sub>: ([M+H]<sup>+</sup>) 352.0735; Found: 352.0736.

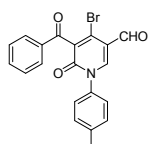

**5-benzoyl-4-bromo-6-oxo-1-p-tolyl-1,6-dihydropyridine-3-carbaldehyde 2n:** yield 81%. White solid. M.p.: 87-88 °C. <sup>1</sup>H NMR (600 MHz, CDCl<sub>3</sub>) δ 10.12 (s, 1 H), 8.29 (s, 1 H), 7.98 (d, *J* = 7.8 Hz, 2 H), 7.65 (t, 1 H), 7.52 (t, 2 H), 7.34-7.29 (m, 4 H), 2.44 (s, 3 H). <sup>13</sup>C NMR (150 MHz, CDCl<sub>3</sub>) δ 191.6, 187.4, 158.2, 143.5, 140.1, 135.9, 134.9, 134.4, 133.0, 132.3, 130.2 (2 C), 129.4 (2 C), 129.0 (2 C), 125.7 (2C), 114.9, 21.7. HRMS Calcd for C<sub>20</sub>H<sub>14</sub>BrNO<sub>3</sub>: ([M+H]<sup>+</sup>) 396.0230; Found: 396.0240.

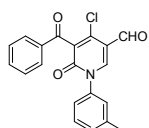

**5-benzoyl-4-chloro-6-oxo-1-m-tolyl-1,6-dihydropyridine-3-carbaldehyde 2o:** yield 82%. White solid. M.p.: 124-125 °C. <sup>1</sup>H NMR (600 MHz, CDCl<sub>3</sub>) δ 10.14 (s, 1 H), 8.30 (s, 1 H), 7.94 (d, *J* = 8.4 Hz, 2 H), 7.62 (t, 1 H), 7.50 (t, 2 H), 7.39 (t, 1 H), 7.28

(d,  $J = 7.7$  Hz, 1 H), 7.19 (t, 2 H), 2.41 (s, 3 H).  $^{13}\text{C}$  NMR (150 MHz,  $\text{CDCl}_3$ )  $\delta$  190.7, 185.5, 158.6, 143.9, 143.3, 140.0, 138.4, 135.4, 134.5, 130.6, 129.6, 129.5, 129.4 (2 C), 129.1 (2 C), 126.7, 123.1, 114.3, 21.3. HRMS Calcd for  $\text{C}_{20}\text{H}_{14}\text{ClNO}_3$ : ( $[\text{M}+\text{H}]^+$ ) 352.0735; Found: 352.0737.

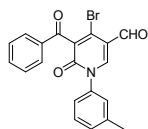

**5-benzoyl-4-bromo-6-oxo-1-m-tolyl-1,6-dihydropyridine-3-carbaldehyde 2p:** yield 83%. White solid. M.p.: 138-139 °C.  $^1\text{H}$  NMR (600 MHz,  $\text{CDCl}_3$ )  $\delta$  10.10 (s, 1 H), 8.26 (s, 1 H), 7.97 (d,  $J = 8.1$  Hz, 2 H), 7.63 (t, 1 H), 7.50 (t, 2 H), 7.40 (t, 1 H), 7.28 (d,  $J = 7.6$  Hz, 1 H), 7.20 (t, 2 H), 2.41 (s, 3 H).  $^{13}\text{C}$  NMR (150 MHz,  $\text{CDCl}_3$ )  $\delta$  191.6, 187.4, 158.3, 143.5, 140.0, 138.4, 135.0, 134.4, 133.1, 132.5, 130.6, 129.5, 129.4 (2 C), 129.0 (2 C), 126.2, 123.1, 114.9, 21.3. HRMS Calcd for  $\text{C}_{20}\text{H}_{14}\text{BrNO}_3$ : ( $[\text{M}+\text{H}]^+$ ) 396.0230; Found: 396.0231.

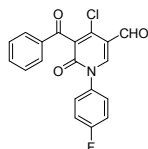

**5-benzoyl-4-chloro-1-(4-fluorophenyl)-6-oxo-1,6-dihydropyridine-3-carbaldehyde 2q:** yield 79%. White solid. M.p.: 148-149 °C.  $^1\text{H}$  NMR (600 MHz,  $\text{CDCl}_3$ )  $\delta$  10.14 (s, 1 H), 8.27 (s, 1 H), 7.94 (d,  $J = 8.0$  Hz, 2 H), 7.63 (t, 1 H), 7.50 (t, 2 H), 7.41-7.38 (m, 2 H), 7.20 (t, 2 H).  $^{13}\text{C}$  NMR (150 MHz,  $\text{CDCl}_3$ )  $\delta$  190.5, 185.4, 163.8, 162.1, 158.5, 143.6, 143.4, 135.3, 134.6, 134.4, 129.4, 129.1 (2 C), 128.2 (2 C), 128.1, 116.9, 116.7, 114.6. HRMS Calcd for  $\text{C}_{19}\text{H}_{11}\text{ClFNO}_3$ : ( $[\text{M}+\text{H}]^+$ ) 356.0485; Found: 356.0484.

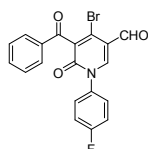

**5-benzoyl-4-bromo-1-(4-fluorophenyl)-6-oxo-1,6-dihydropyridine-3-carbaldehyde 2r:** yield 78%. White solid. M.p.: 128-129 °C.  $^1\text{H}$  NMR (600 MHz,  $\text{CDCl}_3$ )  $\delta$  10.10 (s, 1 H), 8.23 (s, 1 H), 7.95 (d,  $J = 8.0$  Hz, 2 H), 7.63 (t, 1 H), 7.50 (t, 2 H), 7.42-7.38 (m, 2 H), 7.20 (t, 2 H).  $^{13}\text{C}$  NMR (150 MHz,  $\text{CDCl}_3$ )  $\delta$  191.4, 187.3, 164.2, 161.2, 158.2, 143.2, 134.9, 134.5, 133.3, 132.8, 129.5 (2 C), 129.1 (2 C), 128.2, 128.1,

116.9, 116.7, 115.2. HRMS Cacl'd for  $C_{19}H_{11}BrFNO_3$ :  $([M+H]^+)$  399.9979; Found: 399.9981.

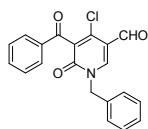

**5-benzoyl-1-benzyl-4-chloro-6-oxo-1,6-dihydropyridine-3-carbaldehyde 2s:** yield 85%. White solid. M.p.: 129-130 °C.  $^1H$  NMR (600 MHz,  $CDCl_3$ )  $\delta$  10.05 (s, 1 H), 8.23 (s, 1 H), 7.90 (d,  $J = 8.0$  Hz, 2 H), 7.63 (t, 1 H), 7.49 (t, 2 H), 7.39-7.37 (m, 3 H), 7.36-7.34 (m, 2 H), 5.18 (s, 2 H).  $^{13}C$  NMR (150 MHz,  $CDCl_3$ )  $\delta$  190.7, 185.3, 159.0, 143.1, 143.0, 135.4, 134.5, 134.1, 129.4 (4 C), 129.2, 129.1 (2 C), 129.0, 128.9 (2 C), 114.5, 53.2. HRMS Cacl'd for  $C_{20}H_{14}ClNO_3$ :  $([M+H]^+)$  352.0735; Found: 352.0742.

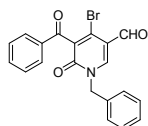

**5-benzoyl-1-benzyl-4-bromo-6-oxo-1,6-dihydropyridine-3-carbaldehyde 2t:** yield 85%. White solid. M.p.: 137-138 °C.  $^1H$  NMR (600 MHz,  $CDCl_3$ )  $\delta$  10.00 (s, 1 H), 8.20 (s, 1 H), 7.90 (d,  $J = 7.3$  Hz, 2 H), 7.63 (t, 1 H), 7.49 (t, 2 H), 7.39-7.35 (m, 5 H), 5.16 (s, 2 H).  $^{13}C$  NMR (150 MHz,  $CDCl_3$ )  $\delta$  191.7, 187.3, 158.7, 142.7, 135.0, 134.5, 134.1, 132.9, 131.8, 129.5 (2 C), 129.4 (2 C), 129.2, 129.1 (2 C), 128.8 (2 C), 115.1, 53.3. HRMS Cacl'd for  $C_{20}H_{14}BrNO_3$ :  $([M+H]^+)$  396.0230; Found: 396.0237.

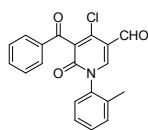

**5-benzoyl-4-chloro-6-oxo-1-o-tolyl-1,6-dihydropyridine-3-carbaldehyde 2u:** yield 77%. White solid. M.p.: 66-67 °C.  $^1H$  NMR (600 MHz,  $CDCl_3$ )  $\delta$  10.14 (s, 1 H), 8.19 (s, 1 H), 7.93 (d,  $J = 8.3$  Hz, 2 H), 7.63 (t, 1 H), 7.50 (t, 2 H), 7.39 (t, 1 H), 7.35 (d,  $J = 7.5$  Hz, 2 H), 7.20 (d,  $J = 7.9$  Hz, 1 H), 2.19 (s, 3 H).  $^{13}C$  NMR (150 MHz,  $CDCl_3$ )  $\delta$  190.5, 185.4, 158.2, 144.1, 143.5, 137.9, 135.5, 134.7, 134.5, 131.5, 130.3, 129.7, 129.3 (2 C), 129.1 (2 C), 127.6, 126.8, 114.4, 17.7. HRMS Cacl'd for  $C_{20}H_{14}ClNO_3$ :  $([M+H]^+)$  352.0735; Found: 352.0741.

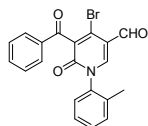

**5-benzoyl-4-bromo-6-oxo-1-(o-tolyl)-1,6-dihydropyridine-3-carbaldehyde 2v:**

White solid. M.p.: 73-75 °C. <sup>1</sup>H NMR (600 MHz, CDCl<sub>3</sub>) δ 10.10 (s, 1 H), 8.16 (s, 1 H), 7.93 (d, *J* = 8.3 Hz, 2 H), 7.63 (t, 1 H), 7.50 (t, 2 H), 7.39 (t, 1 H), 7.35 (d, *J* = 7.5 Hz, 2 H), 7.20 (d, *J* = 7.8 Hz, 1 H), 2.19 (s, 3 H). <sup>13</sup>C NMR (150 MHz, CDCl<sub>3</sub>) δ 191.5, 187.4, 158.8, 143.8, 137.9, 135.1, 134.7, 134.4, 133.3, 132.5, 131.5, 130.3, 129.4 (2 C), 129.1 (2 C), 127.6, 126.8, 115.0, 17.7. HRMS Calcd for C<sub>20</sub>H<sub>14</sub>BrNO<sub>3</sub>: ([M+H]<sup>+</sup>) 396.0230; Found: 396.0235.

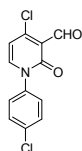

**4-chloro-1-(4-chlorophenyl)-2-oxo-1,2-dihydropyridine-3-carbaldehyde 2w:**

yellowish solid. M.p.: 166-167 °C. <sup>1</sup>H NMR (600 MHz, CDCl<sub>3</sub>) δ: 10.27 (s, 1 H), 7.59 (d, *J* = 7.1 Hz, 1 H), 7.53 (d, *J* = 8.5 Hz, 2 H), 7.27 (d, *J* = 8.4 Hz, 2 H), 6.76 (d, *J* = 7.1 Hz, 1 H). <sup>13</sup>C NMR (150 MHz, CDCl<sub>3</sub>) δ 187.4, 181.9, 144.4, 141.9, 140.7, 136.3, 135.9, 130.2 (2 C), 128.1 (2 C), 115.2. HRMS Calcd for C<sub>12</sub>H<sub>7</sub>Cl<sub>2</sub>NO<sub>2</sub>: ([M+H]<sup>+</sup>) 267.9927; Found: 267.9928.

## 4. Copies of NMR spectra for new compounds

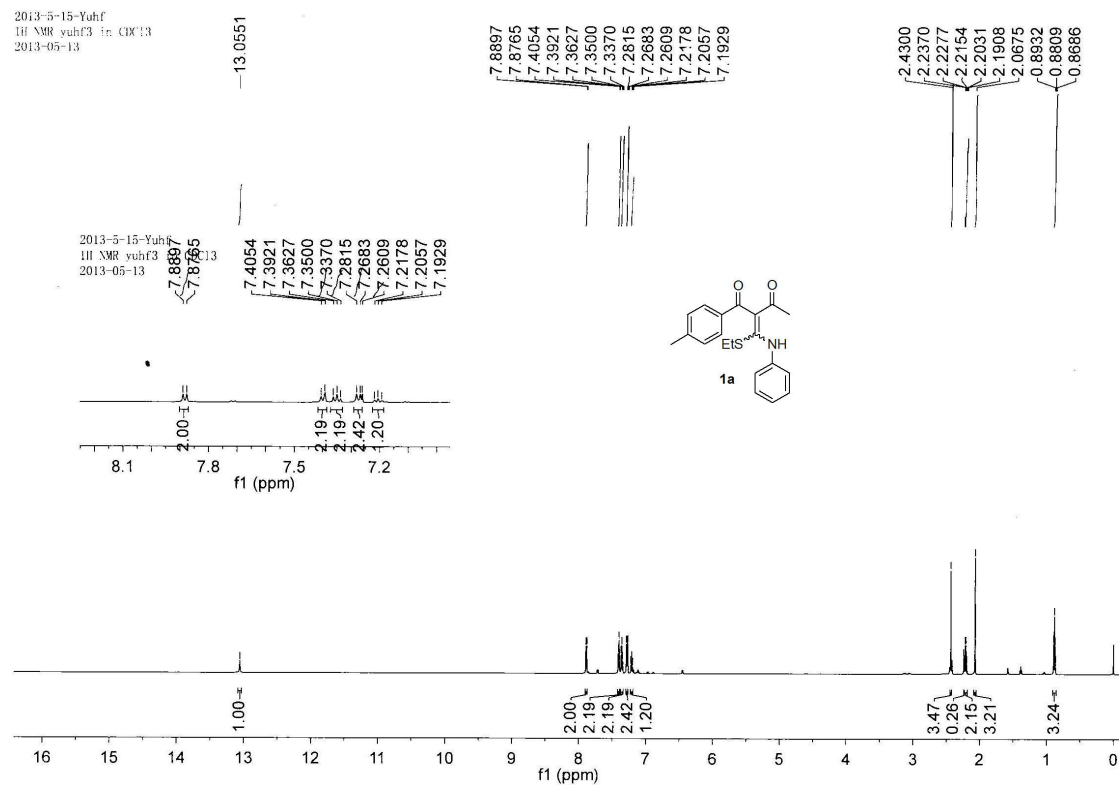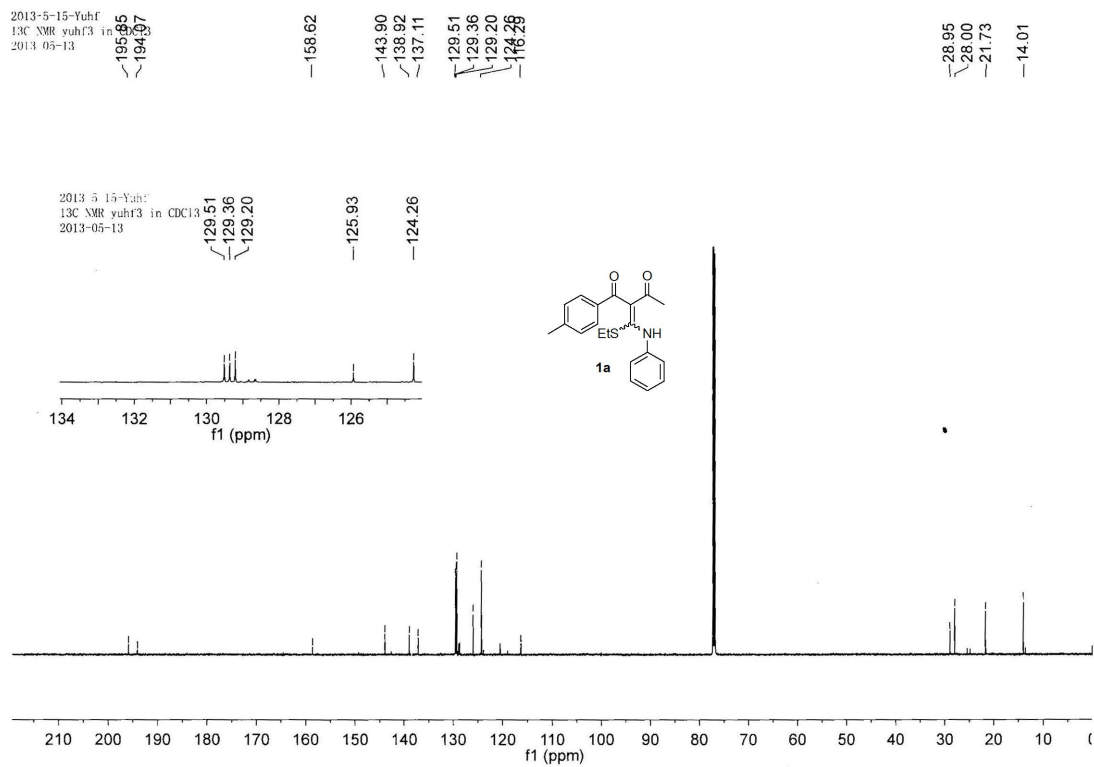



yu1-20  
 1H NMR v.1 in CDCl3  
 2013-07-29

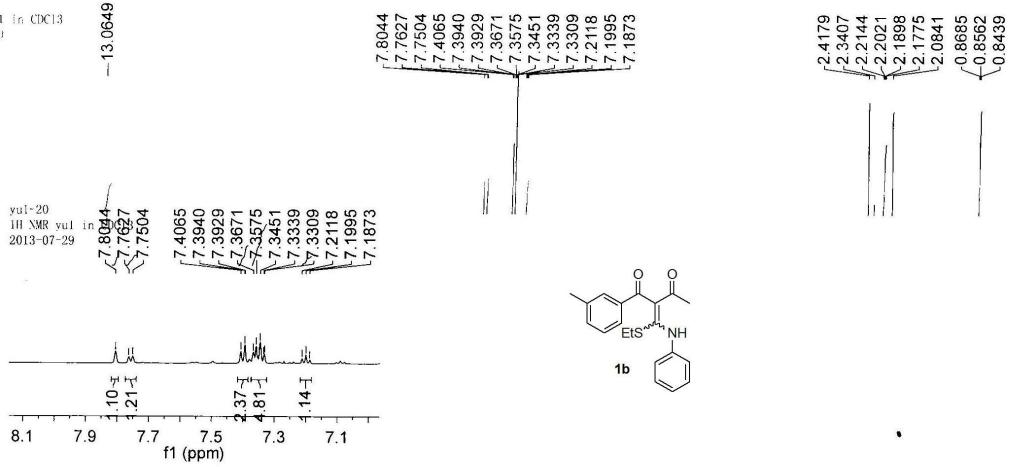

yu1-20  
 13C NMR v.1 in CDCl3  
 2013-07-29

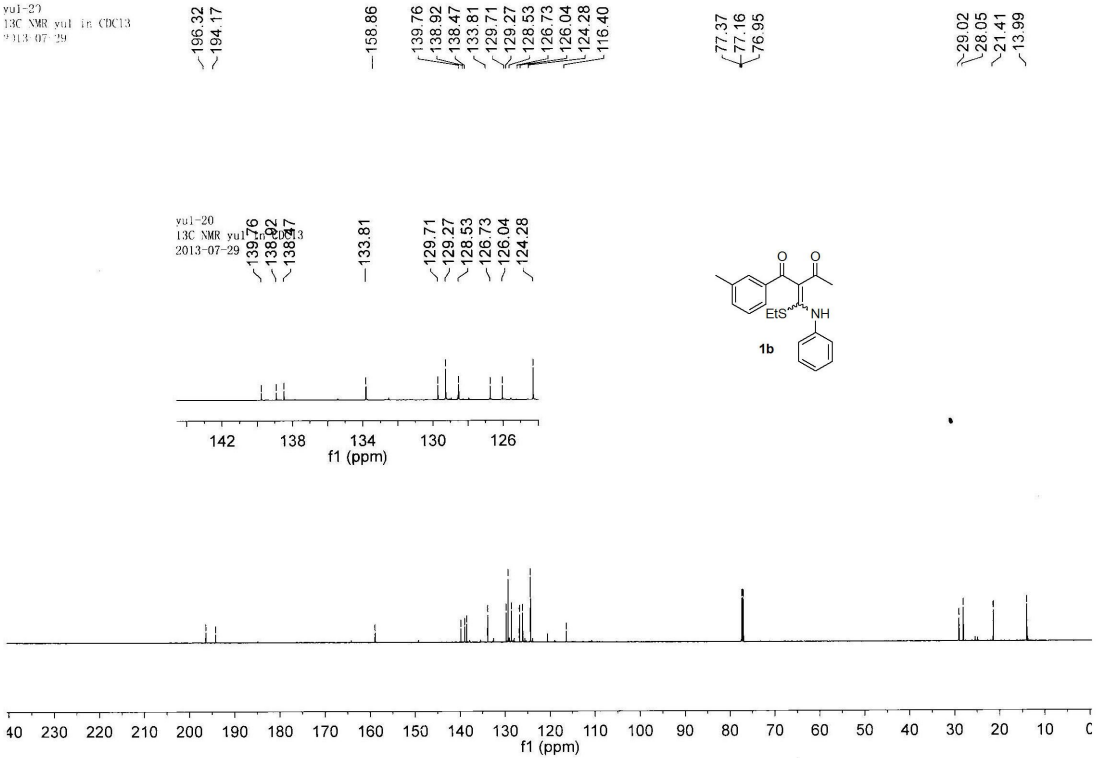

yu1-20  
 13C NMR v.1 in CDCl3  
 2013-07-29

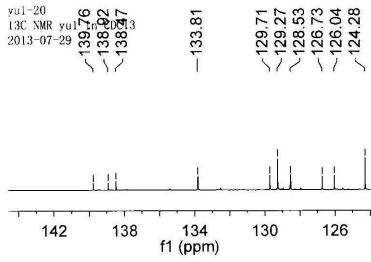

2013-5-15-Yuhf  
 1H NMR yuhf2 in CDCl3  
 2013-05-13

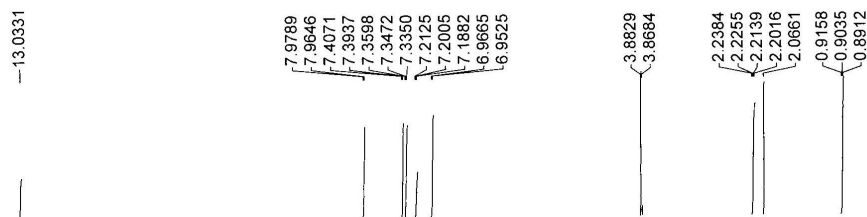

2013-5-15-Yuhf  
 1H NMR yuhf2 in  
 2013-05-13

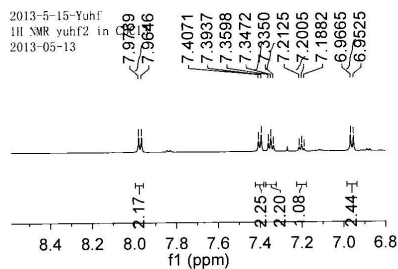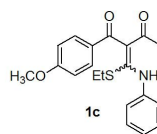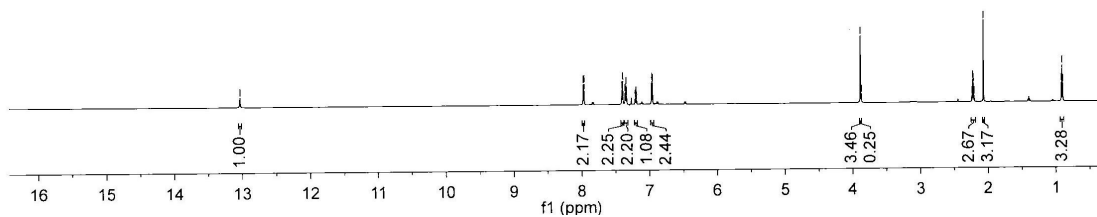

2013-5-15-Yuhf  
 13C NMR yuhf2 in  
 2013-05-13

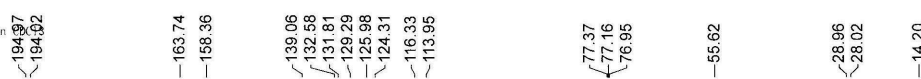

2013-5-15-Yuhf  
 13C NMR yuhf2 in  
 2013-05-13

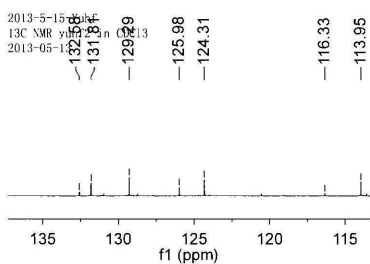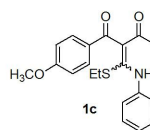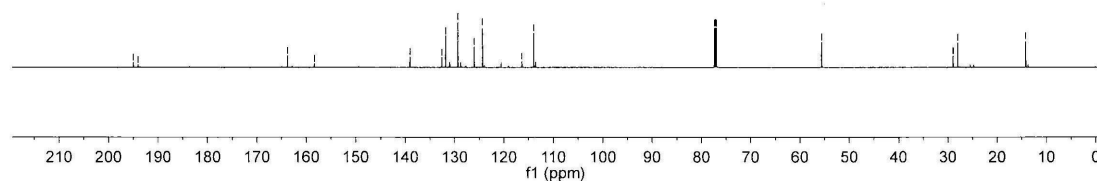

yuhf60-69  
 1H NMR yuhf30 in CDCl3  
 2012-12-25

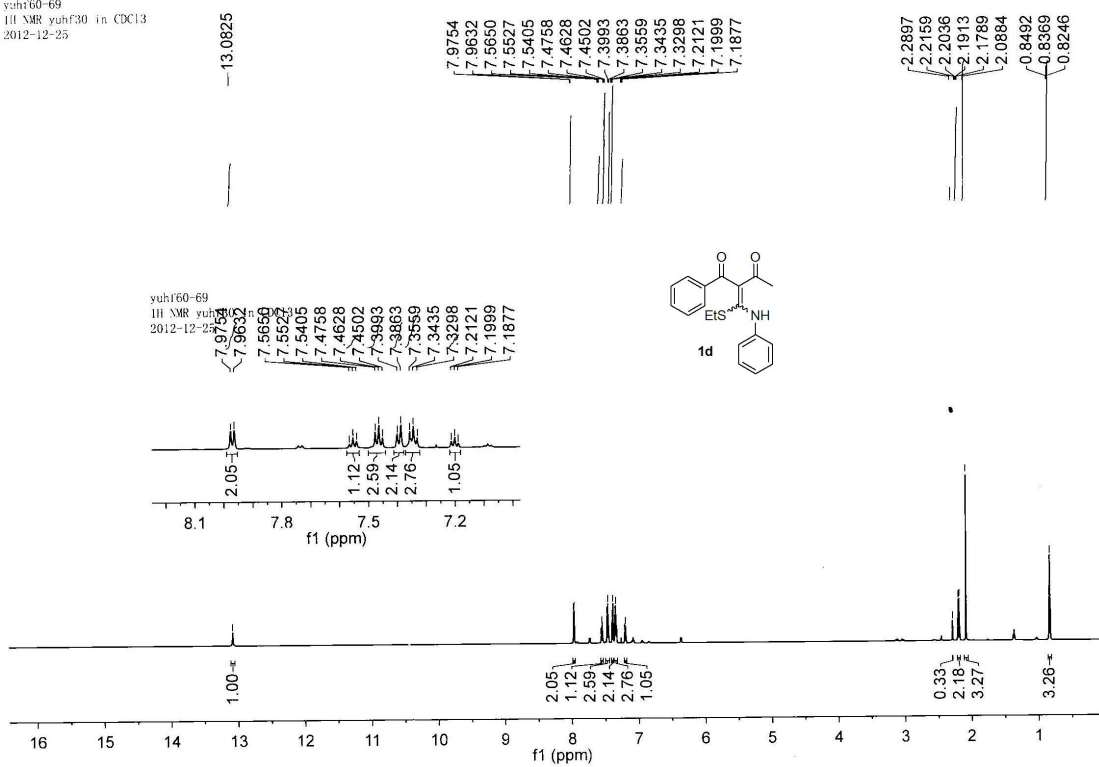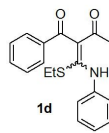

yuhf60-69  
 13C NMR yuhf30 in CDCl3  
 2012-12-25

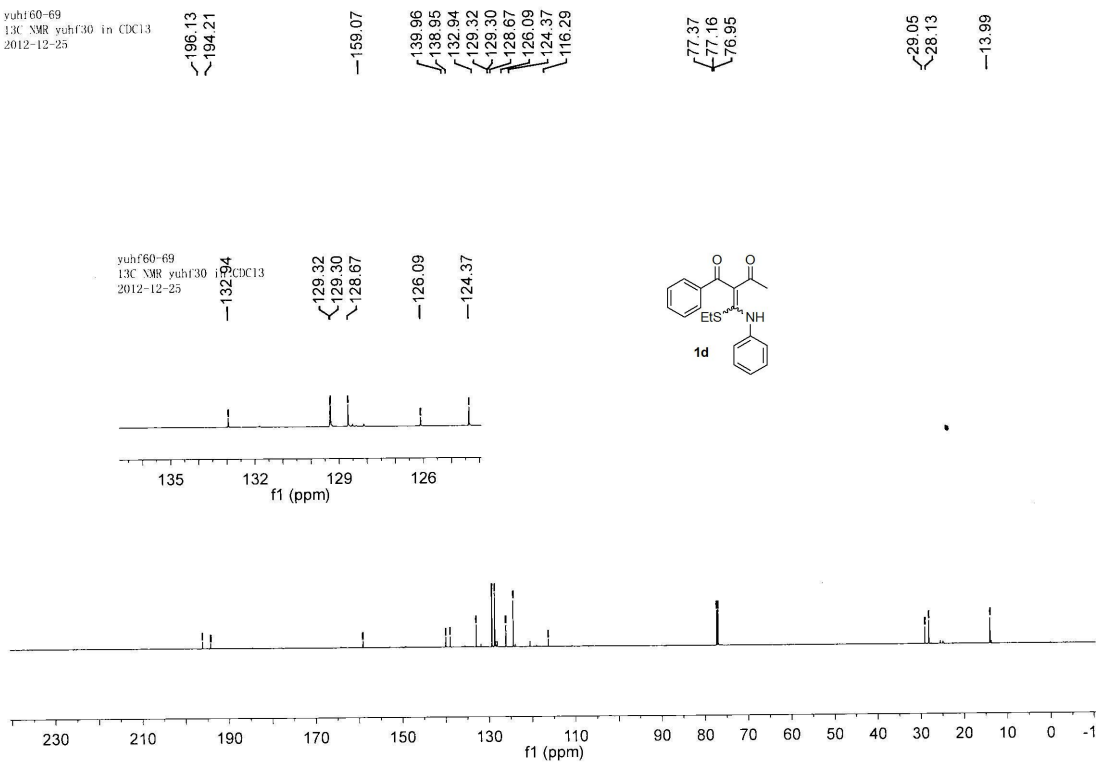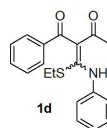

yu1-20  
 1H NMR v.2 in CDCl3  
 2013-07-29

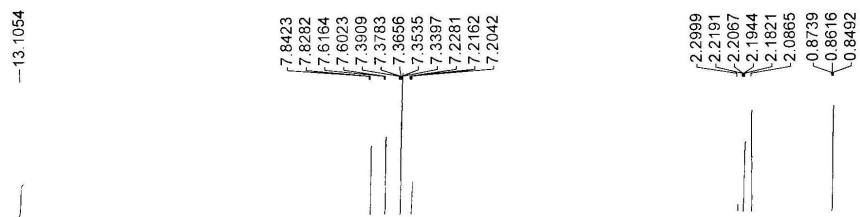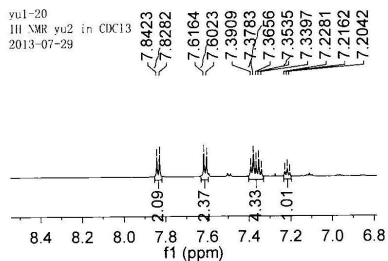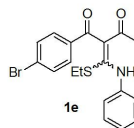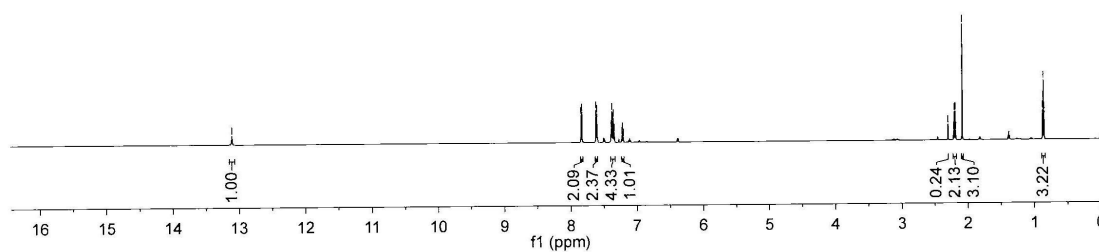

yu1-20  
 13C NMR v.2 in CDCl3  
 2013-07-29

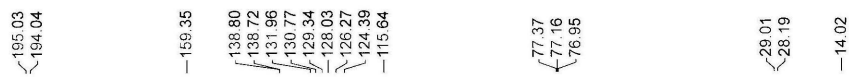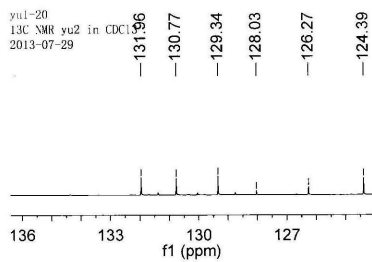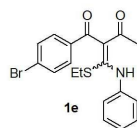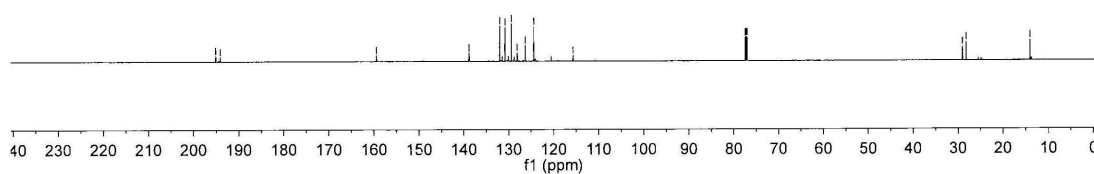

yu1-20  
 1H NMR yu3 in CDCl3  
 2013-07-29

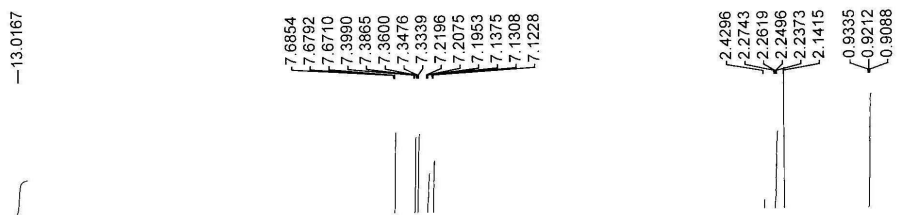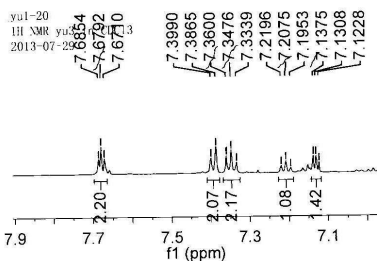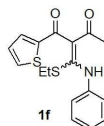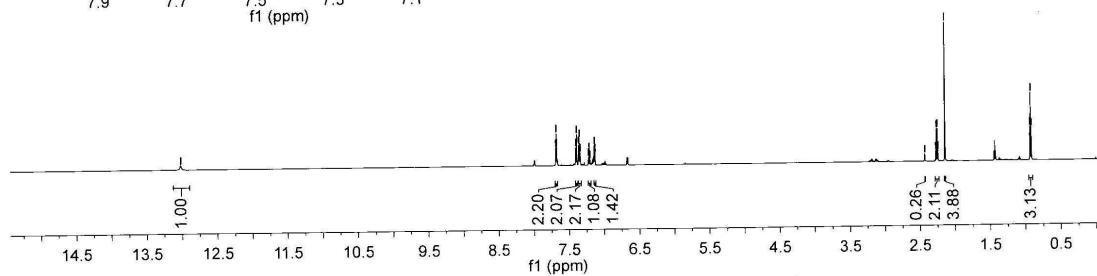

yu1-20  
 13C NMR yu3 in CDCl3  
 2013-07-29

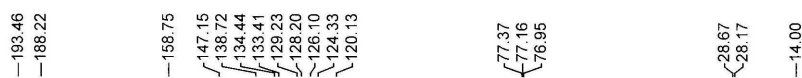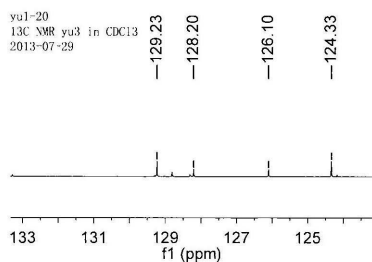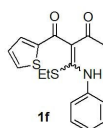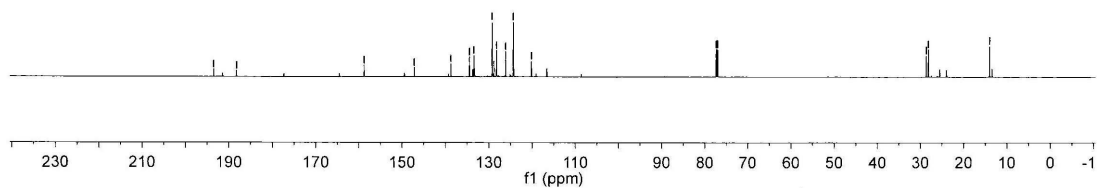

2013-6-8  
 1H NMR yuhf16 in CDCl3  
 2013-06-07

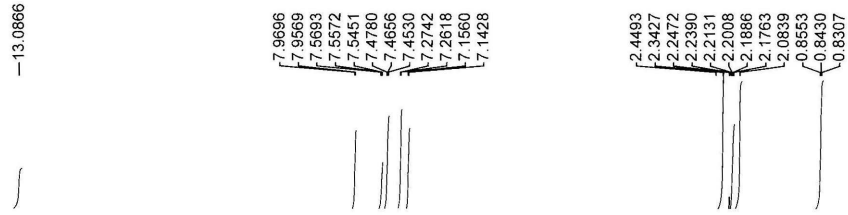

2013-6-8  
 1H NMR yuhf16 in CDCl3  
 2013-06-07

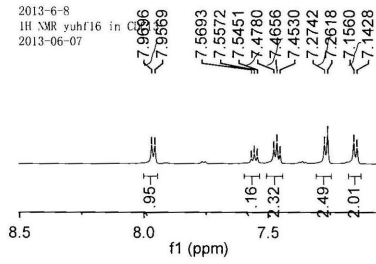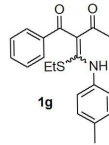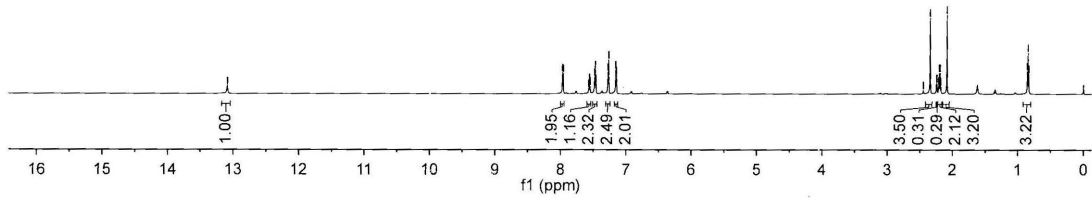

2013-6-8  
 13C NMR yuhf16 in CDCl3  
 2013-06-07

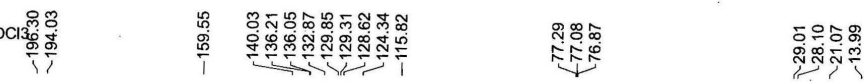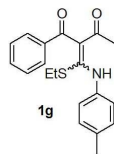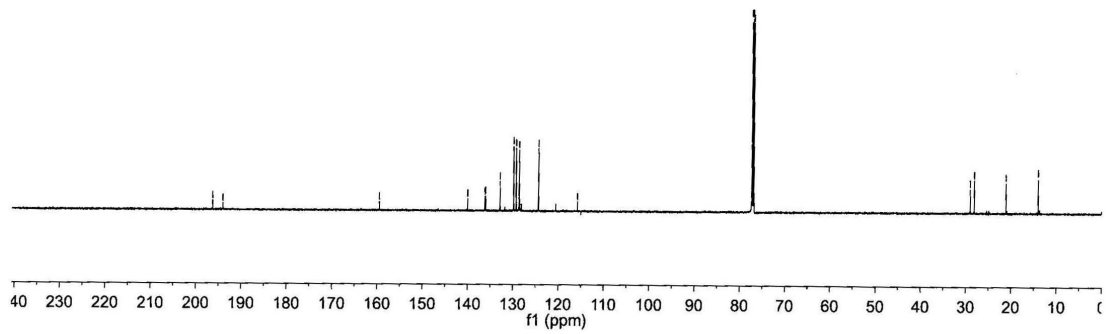

yu1-20  
1H NMR yu4 in CDCl3  
2013-07-29

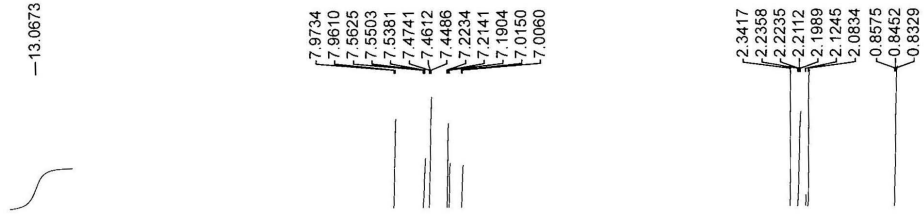

yu1-20  
1H NMR yu4  
2013-07-29

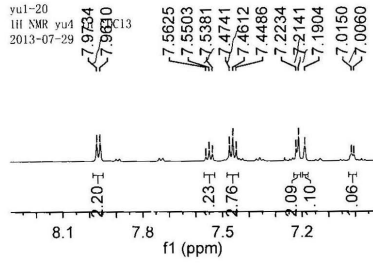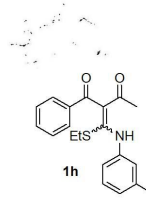

yu1-20  
13C NMR yu4 in CDCl3  
2013-07-29

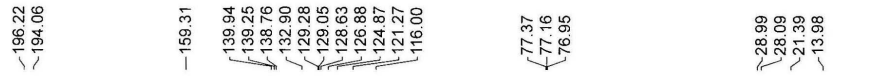

yu1-20  
13C NMR yu4  
2013-07-29

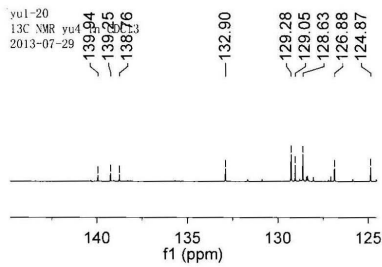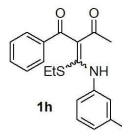

230 210 190 170 150 130 110 90 80 70 60 50 40 30 20 10 0 -1





2013-6-8  
 1H NMR yuhf21 f1 CUC13  
 2013-06-07

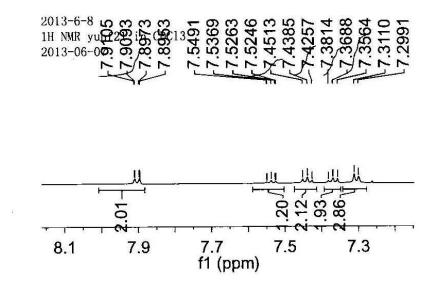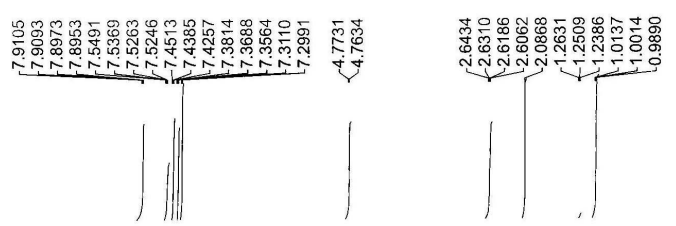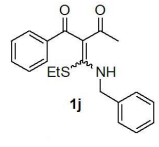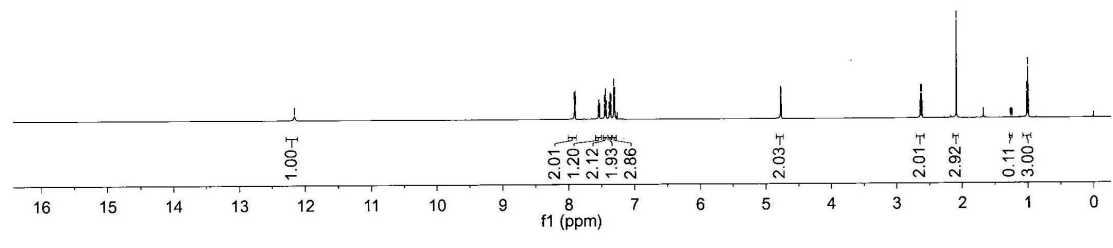

liuzs538-551  
 13C NMR yuhf21 f1  
 2013-06-07

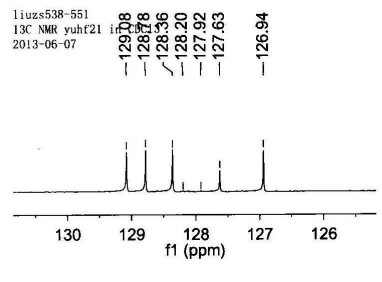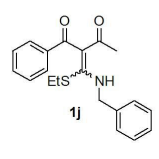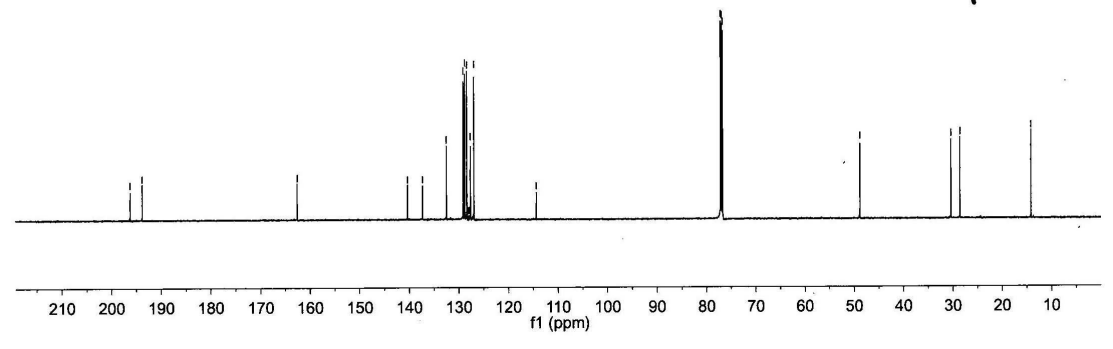

yu1-20  
 1H NMR yu5 in CDCl3  
 2013-07-29

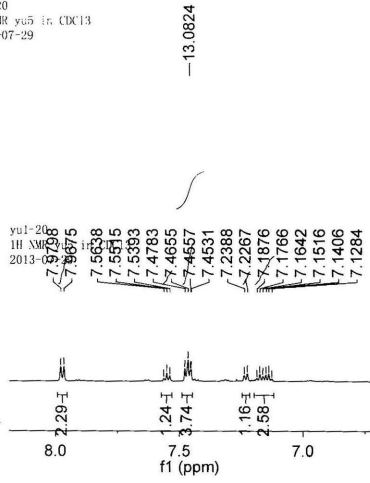

7.9798  
 7.9675  
 7.5638  
 7.5515  
 7.5393  
 7.4783  
 7.4655  
 7.4557  
 7.4531  
 7.2388  
 7.2267  
 7.1876  
 7.1766  
 7.1642  
 7.1516  
 7.1406  
 7.1284

2.3707  
 2.2988  
 2.1864  
 2.1740  
 2.1617  
 2.1494  
 2.1079  
 0.8395  
 0.8272  
 0.8148

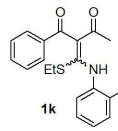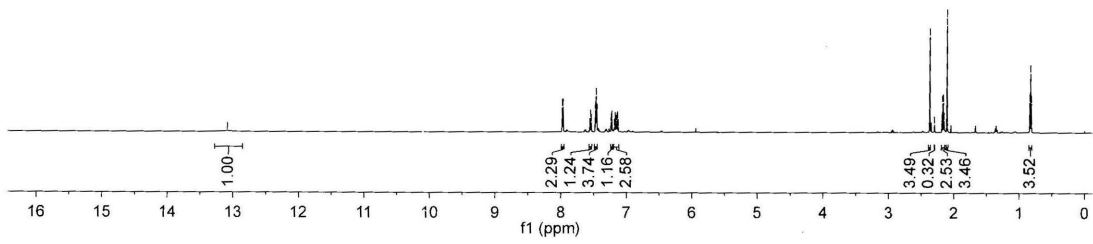

yu1-20  
 13C NMR yu5 in CDCl3  
 2013-07-29

196.15  
 194.13  
 160.73  
 137.55  
 132.86  
 132.78  
 130.87  
 129.25  
 128.61  
 126.63  
 126.57  
 125.53

77.37  
 77.16  
 76.95

28.89  
 28.14  
 18.22  
 14.01

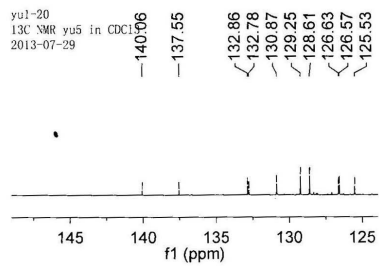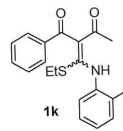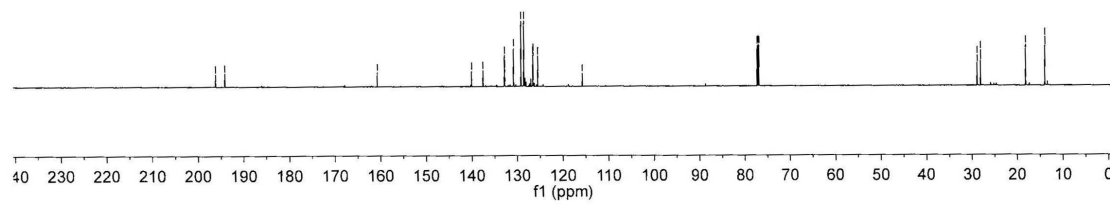

yuhf60-69  
 1H NMR yuhf31 in CDCl3  
 2012-12-26

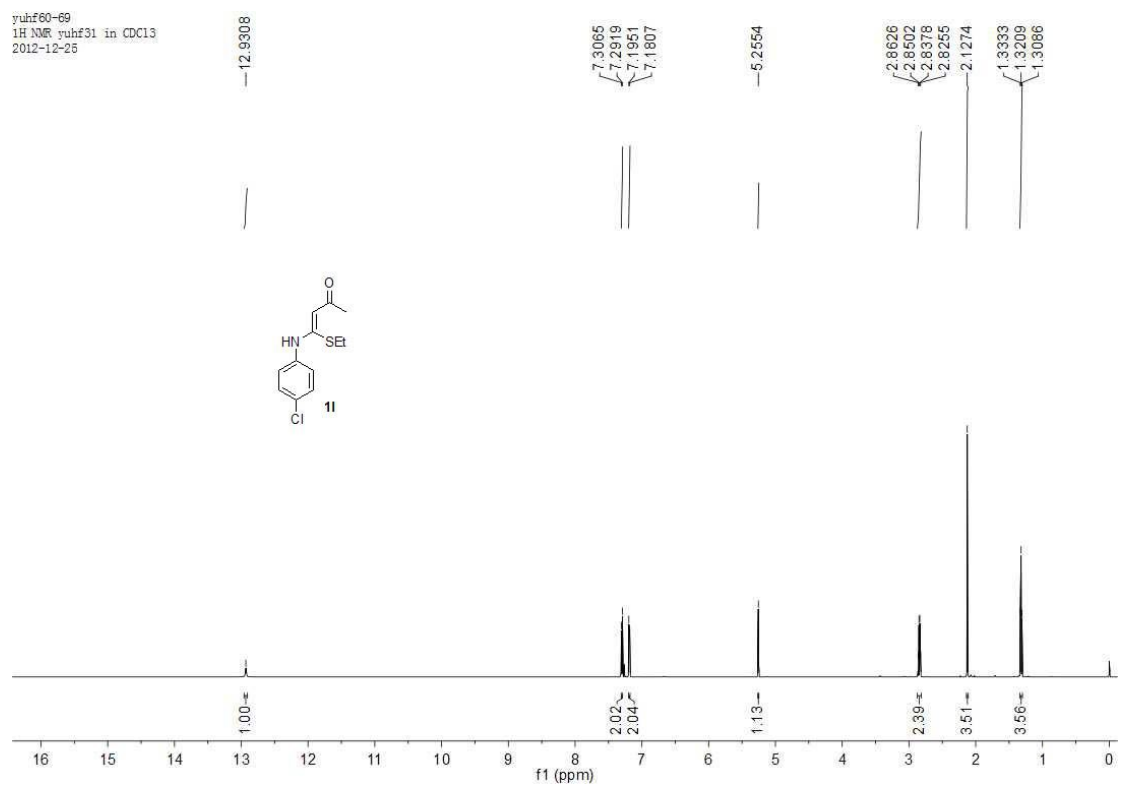

yuhf60-69  
 13C NMR yuhf31 in CDCl3  
 2012-12-26

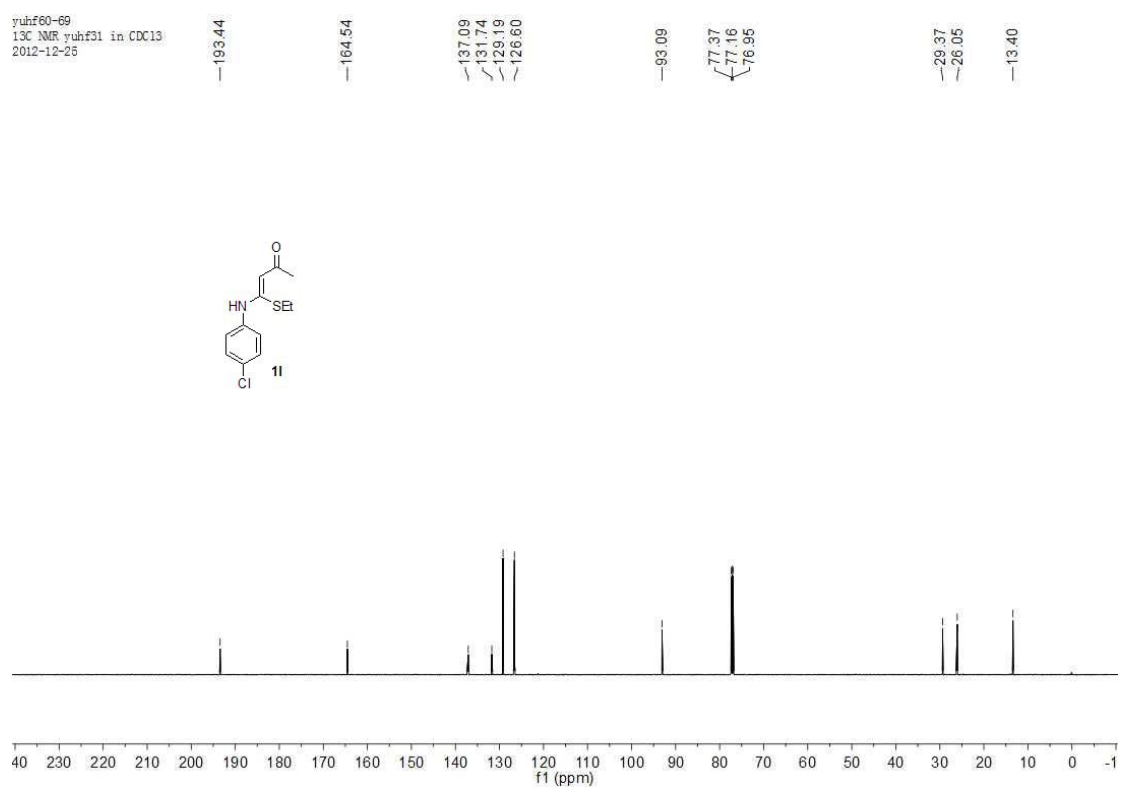

2013-5-15-Yuhf  
 1H NMR yuhf9 in CDCl3  
 2013-05-14

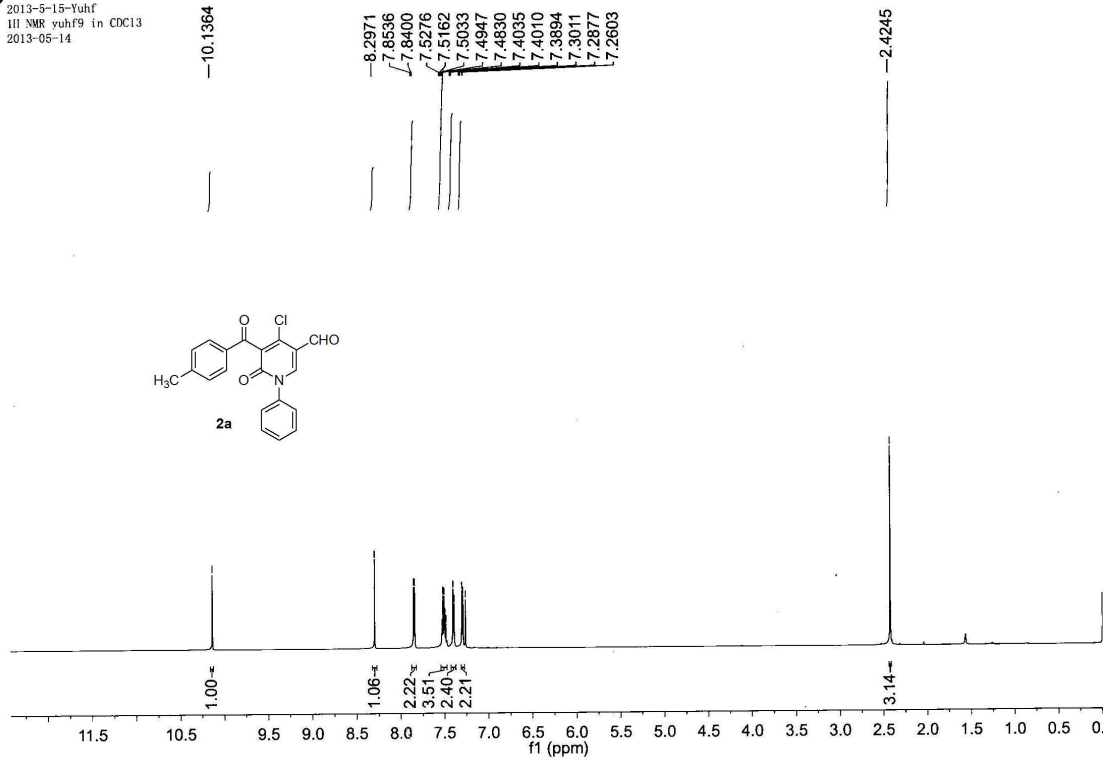

2013-5-15-Yuhf  
 13C NMR yuhf9 in CDCl3  
 2013-05-14

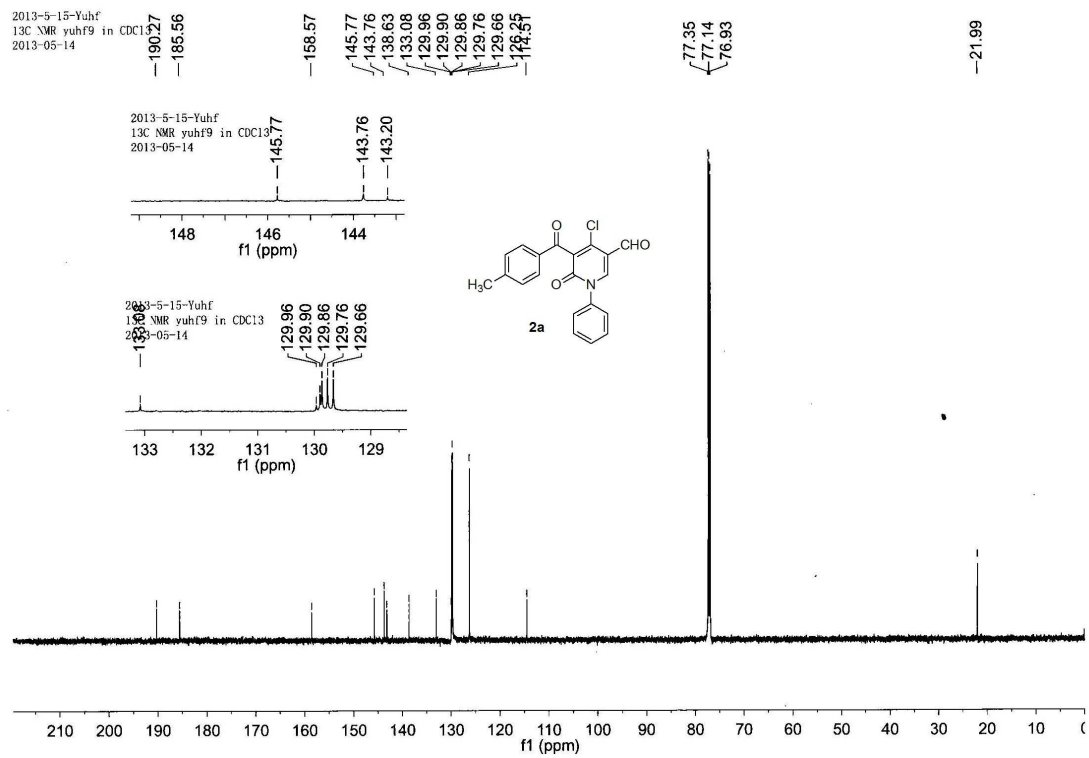

2013-5-15-Yuhf  
 1H NMR sub15 in CDCl3  
 2013-05-13

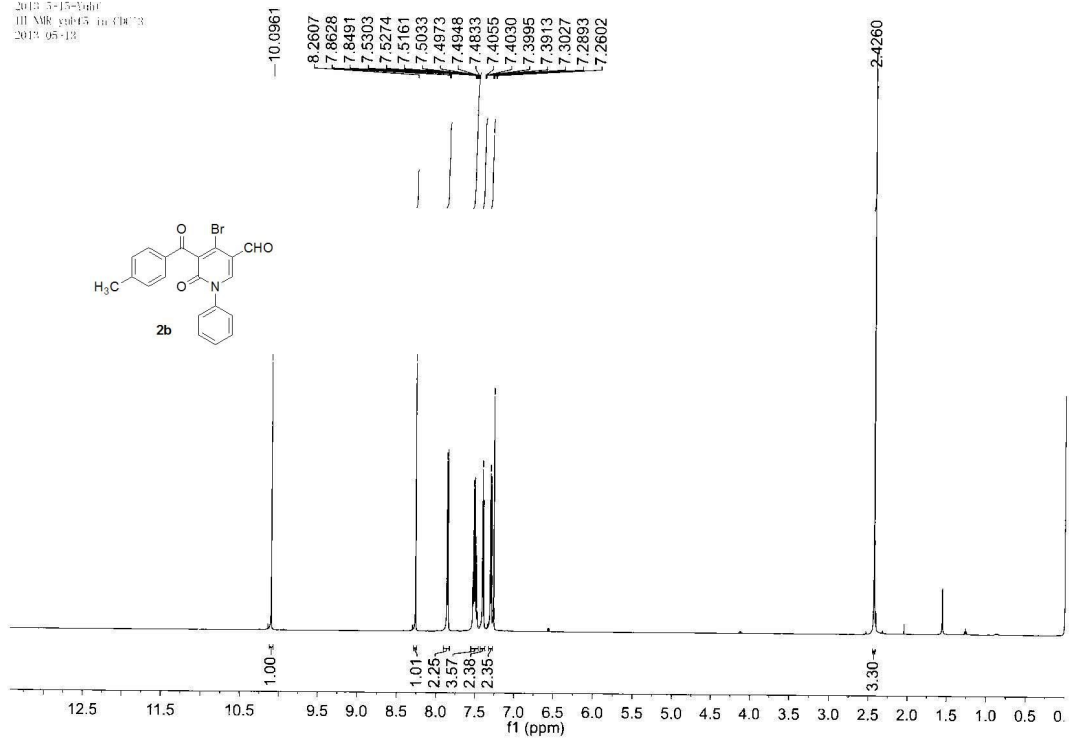

2013-5-15-Yuhf  
 13C NMR sub15 in CDCl3  
 2013-05-13

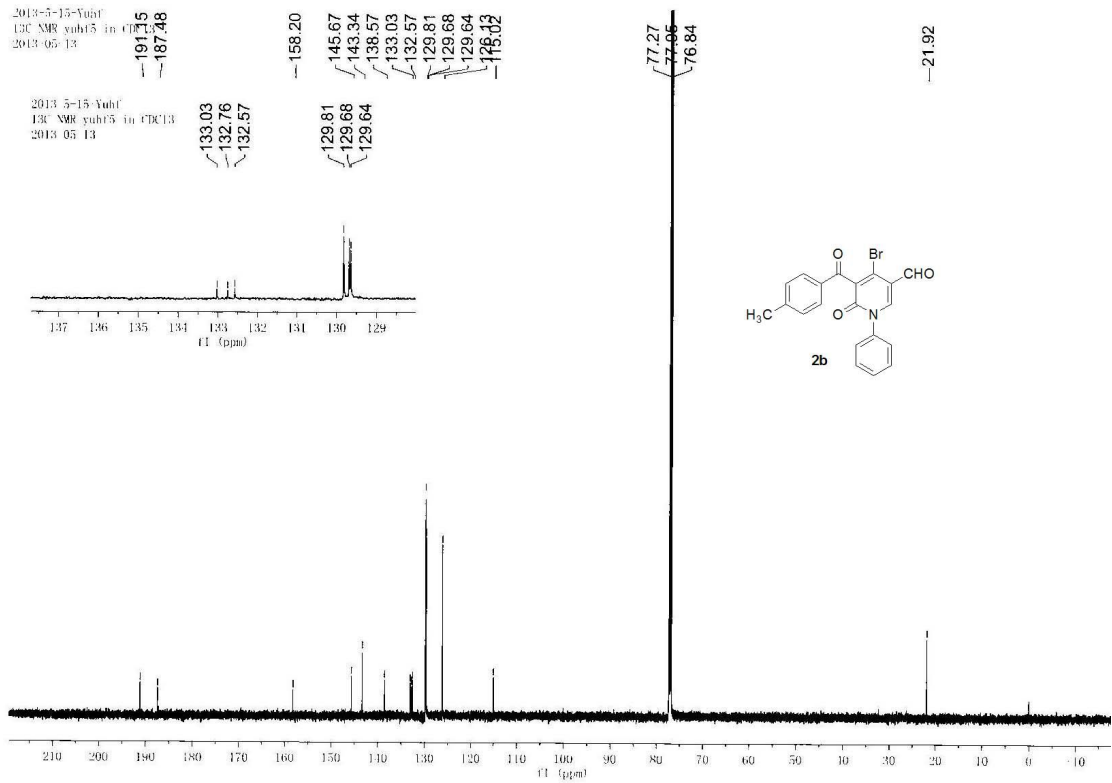

yu1-20  
 1H NMR yu9 in CDCl3  
 2013-07-29

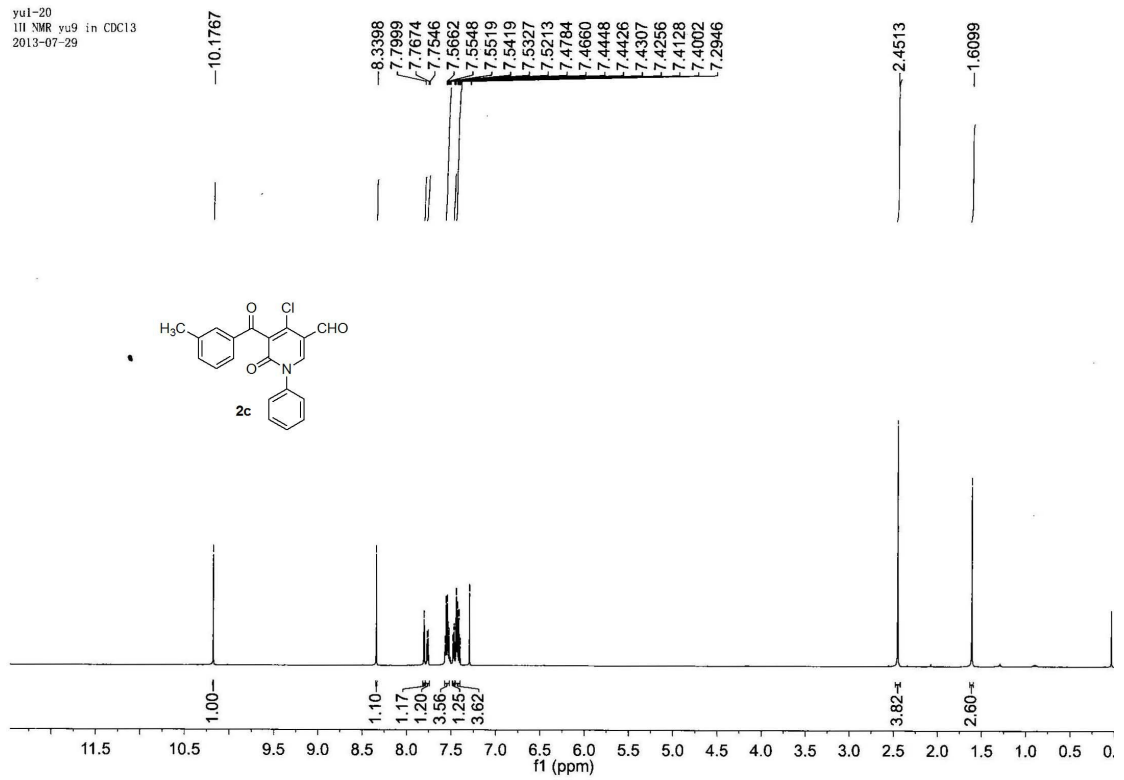

yu1-20  
 13C NMR yu9 in CDCl3  
 2013-07-29

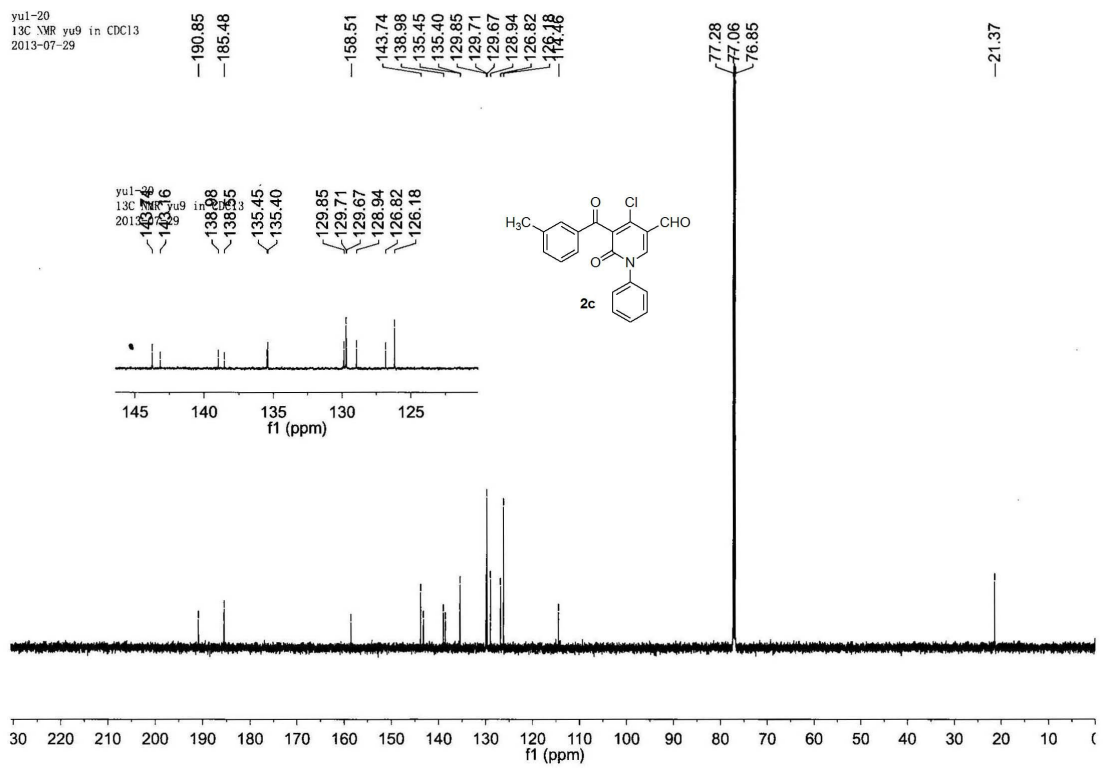

yu1-20  
1H NMR yu10 in CDCl3  
2013-07-29

10.1058  
8.2741  
7.7812  
7.7463  
7.7335  
7.5250  
7.5123  
7.5035  
7.4918  
7.4494  
7.4369  
7.4181  
7.4156  
7.4038  
7.3971  
7.3843  
7.2661

yu1-20  
1H NMR yu10 in  
2013-07-29

7.5250  
7.5123  
7.5035  
7.4918  
7.4494  
7.4369  
7.4181  
7.4156  
7.4038  
7.3971  
7.3843

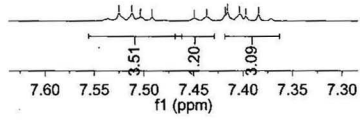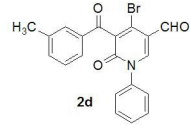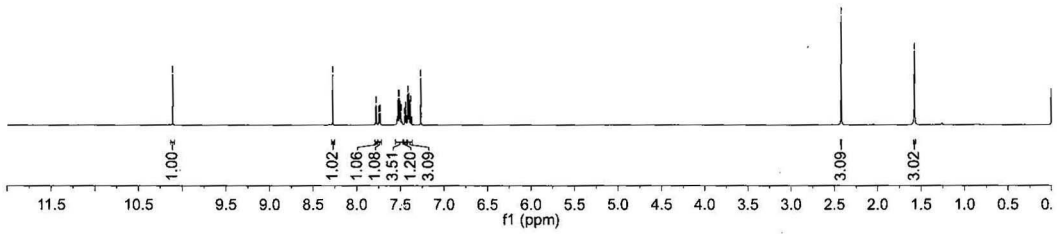

yu1-20  
13C NMR yu10 in CDCl3  
2013-07-29

191.80  
187.46  
158.23  
143.40  
139.01  
135.38  
129.84  
129.73  
129.70  
128.96  
126.88  
126.05  
115.05

yu1-20  
13C NMR yu10 in CDCl3  
2013-07-29

143.910  
139.01  
138.56  
135.38  
135.02  
133.05  
132.76  
129.84  
129.73  
129.70  
128.96

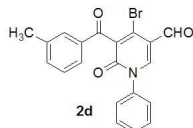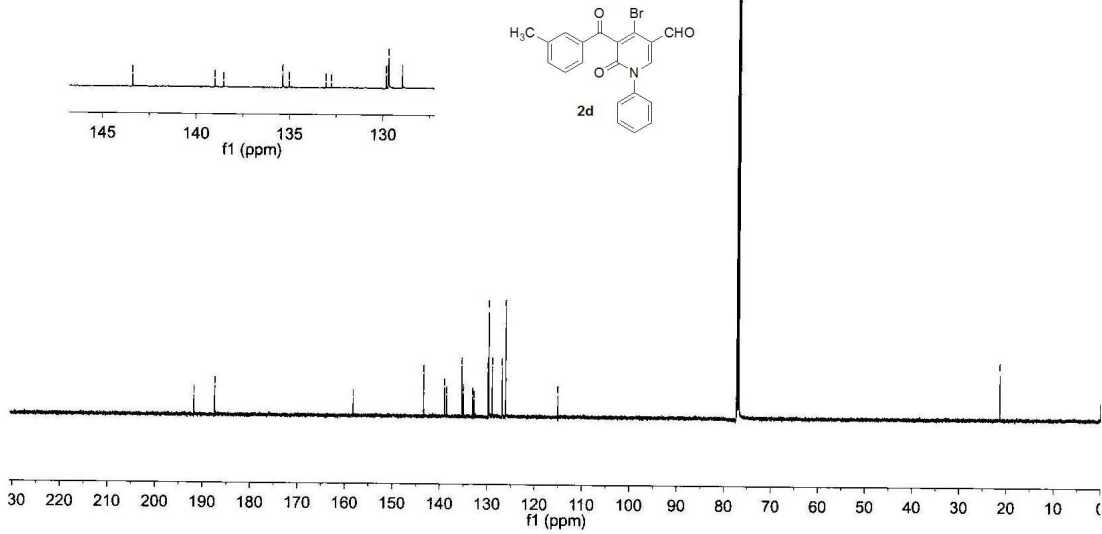

2013-5-15-Yuhf  
 1H NMR sub17 in CDCl3  
 2013-05-11

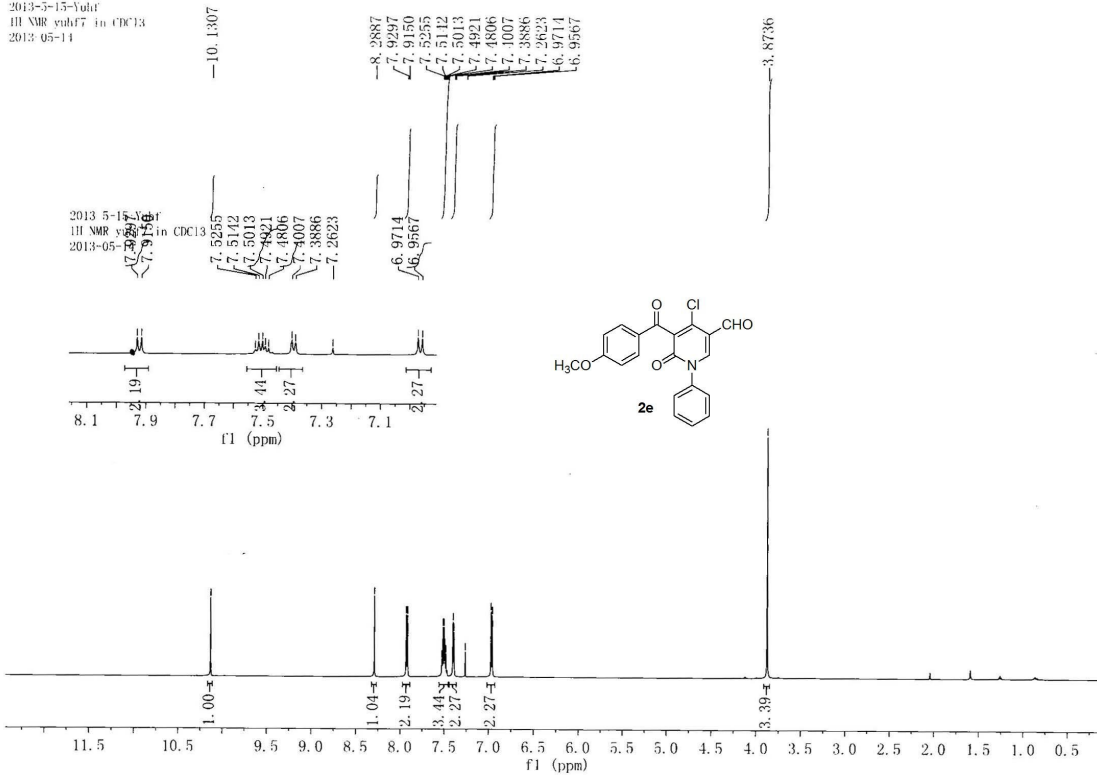

2013-5-15-Yuhf  
 13C NMR sub17 in CDCl3  
 2013-05-11

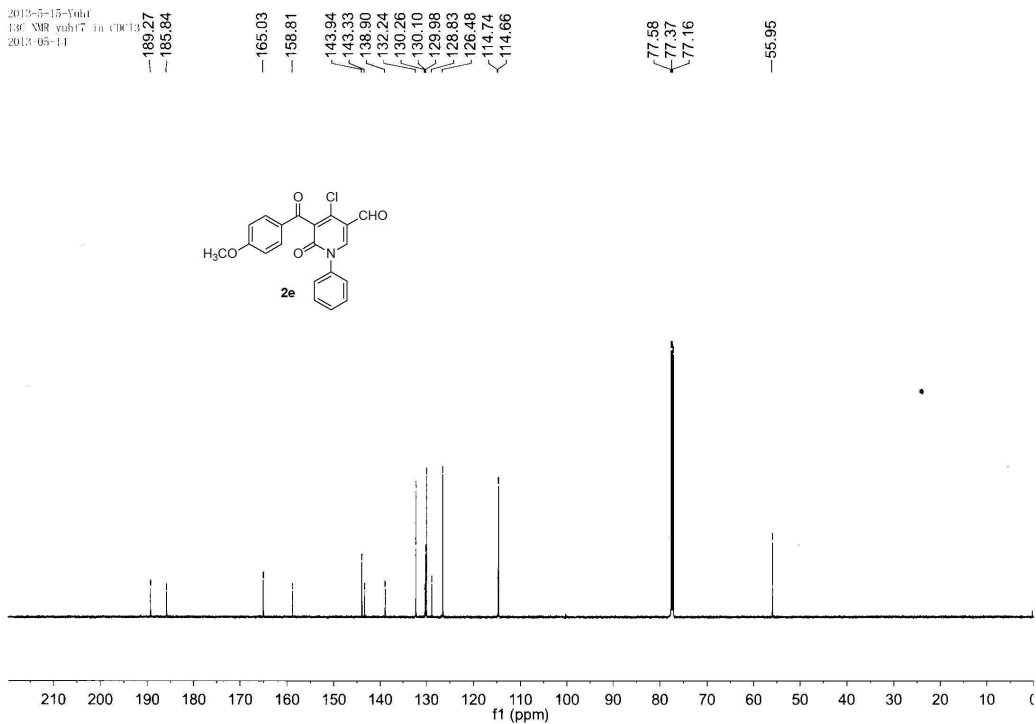



2013-5-15-Yuhf  
 1H NMR yuhf16 in CDCl3  
 2013-05-11

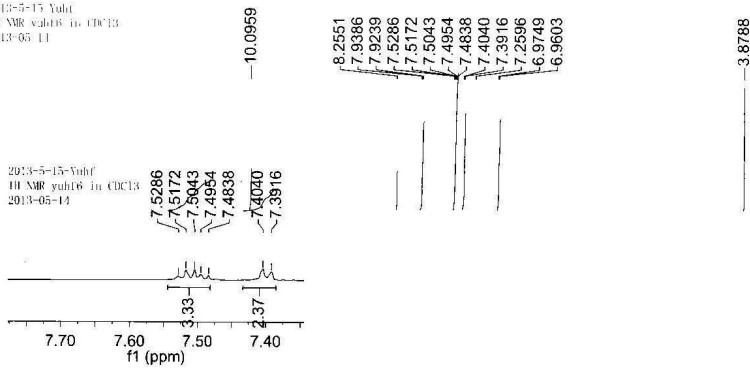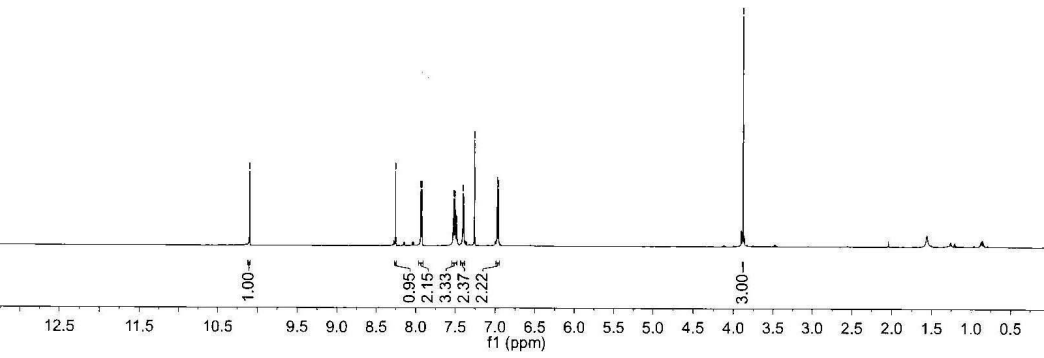

2013-5-15-Yuhf  
 13C NMR yuhf16 in CDCl3  
 2013-05-11

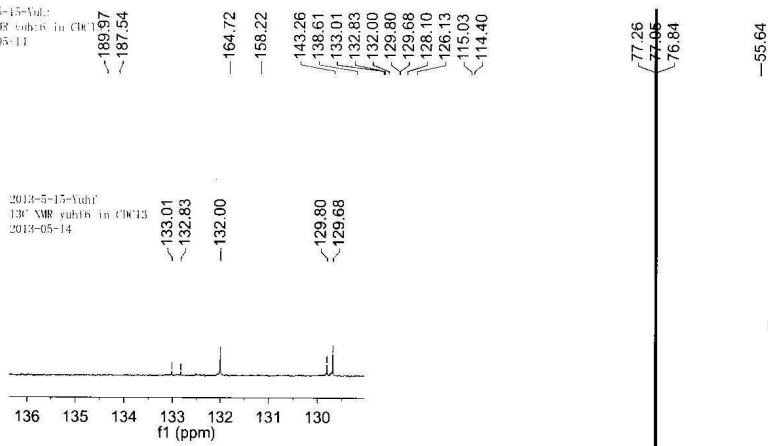

2013-5-15-Yuhf  
 13C NMR yuhf16 in CDCl3  
 2013-05-14

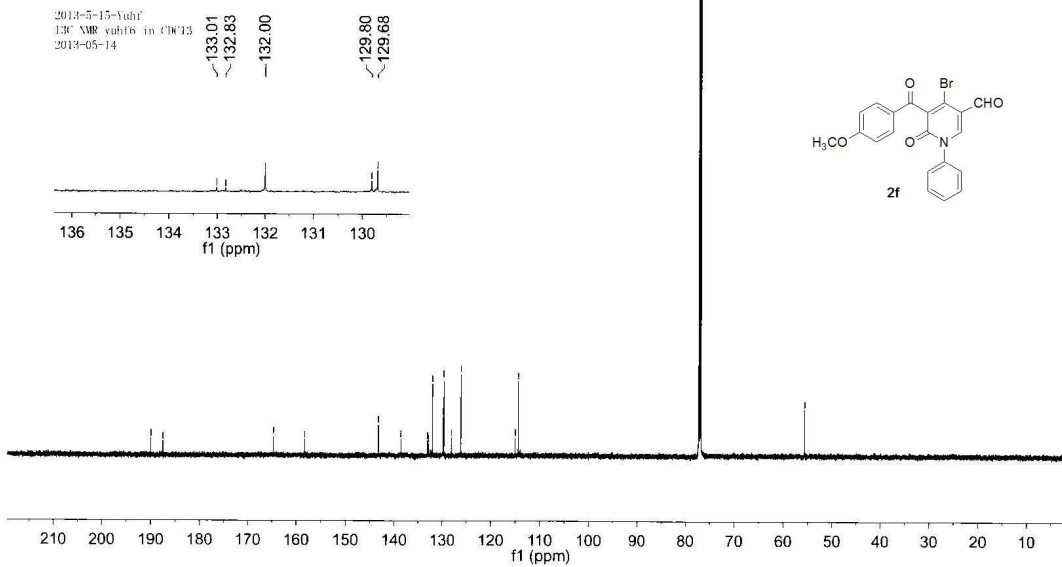

2013-5-15-Yuhf  
 1H NMR yuhf12 in CDCl3  
 2013-05-13

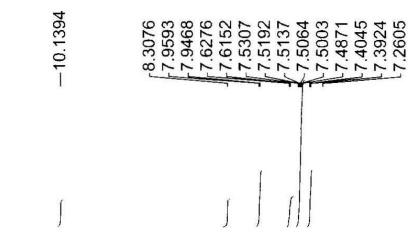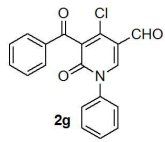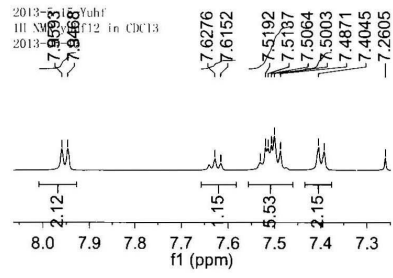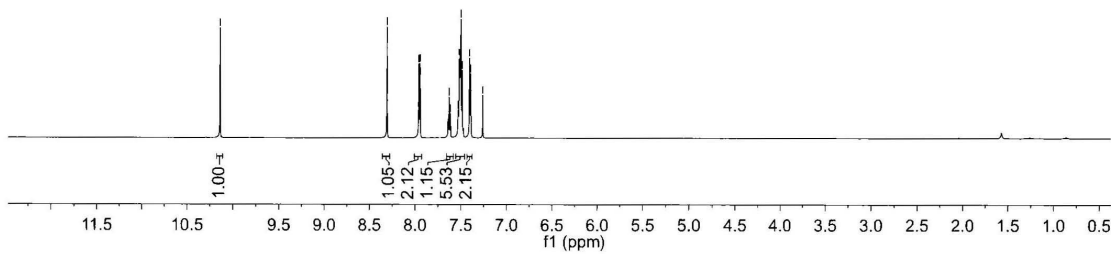

2013-5-15-Yuhf  
 13C NMR yuhf12 in CDCl3  
 2013-05-13

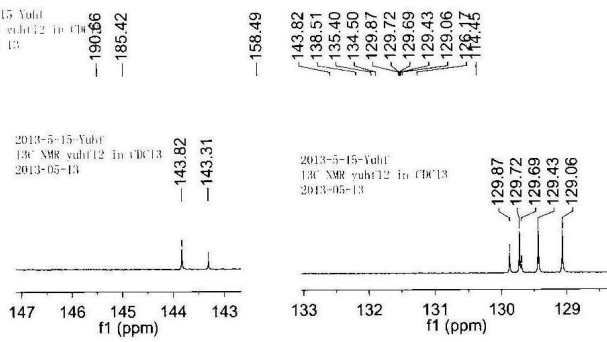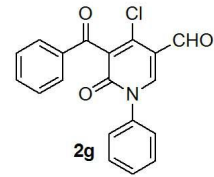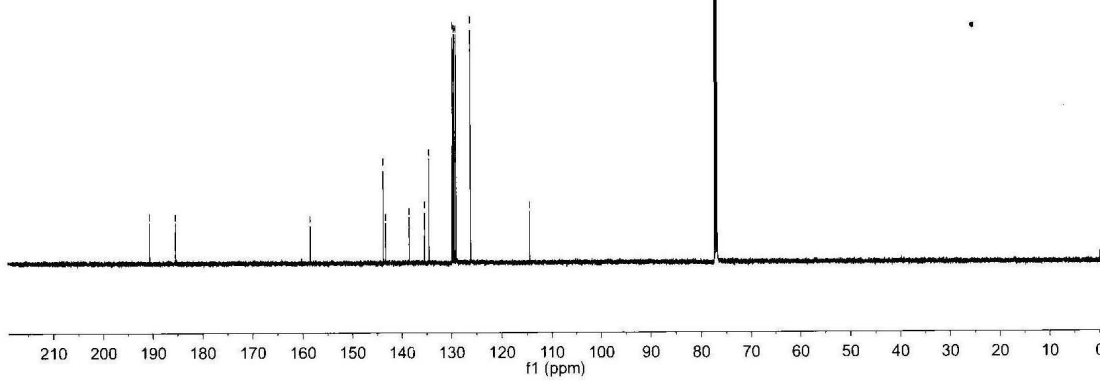

2013-5-15-Yuhf  
1H NMR (400 MHz, CDCl<sub>3</sub>)  
2013-05-13

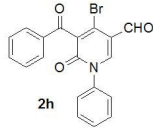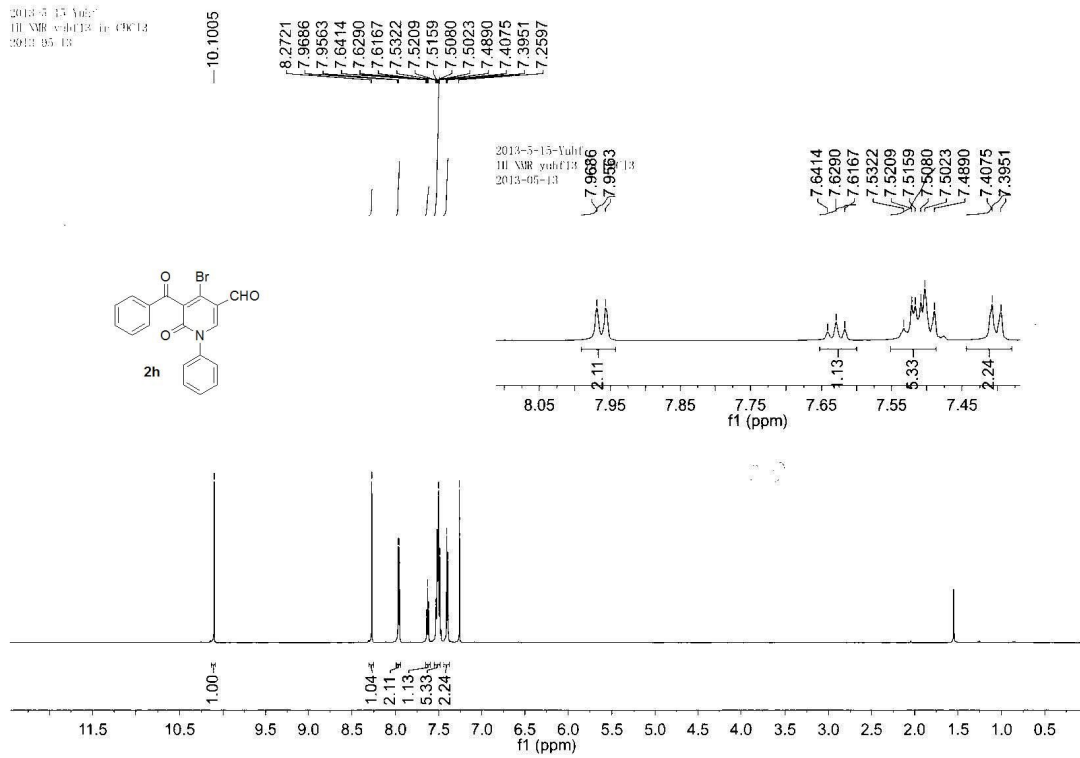

2013-5-15-Yuhf  
13C NMR (100 MHz, CDCl<sub>3</sub>)  
2013-05-13

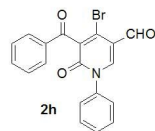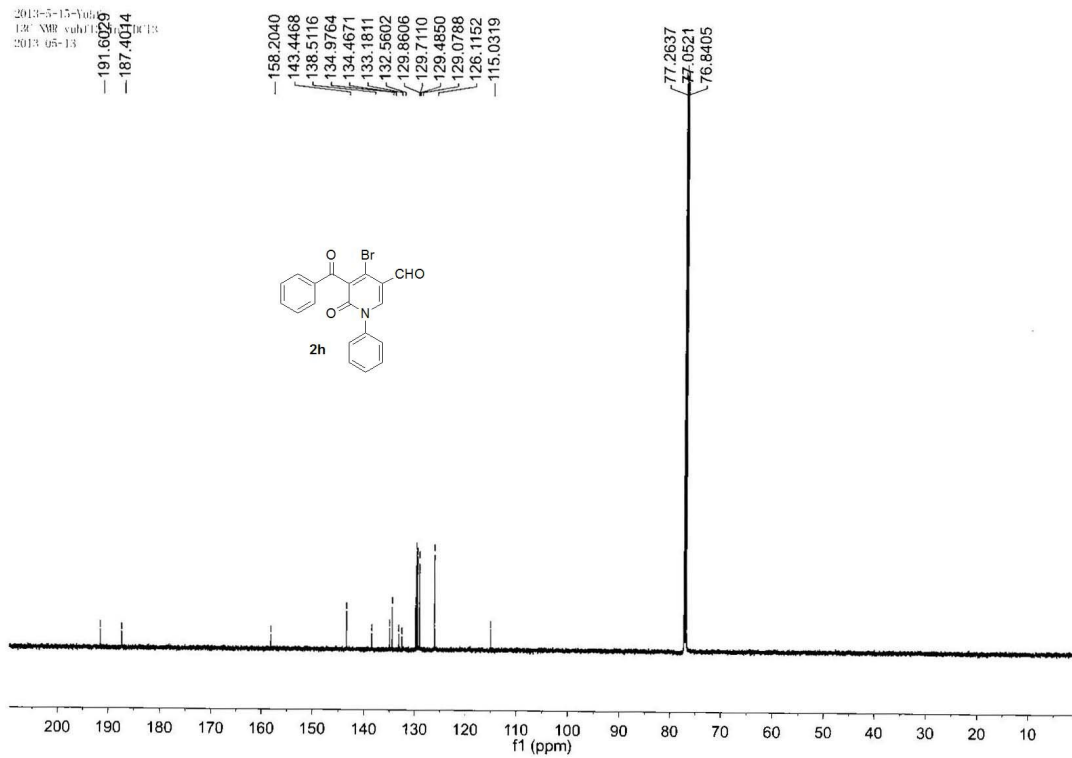

2013-5-15-Vol1  
1H NMR (cdCl3) 36 (300°K)  
2013-05-13

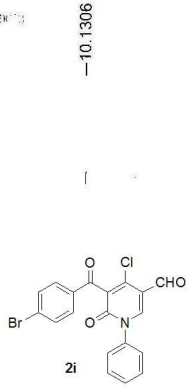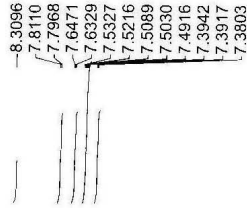

2013-5-15-Vol1  
1H NMR (cdCl3) 36 (300°K)  
2013-05-13

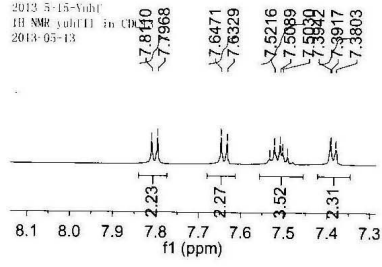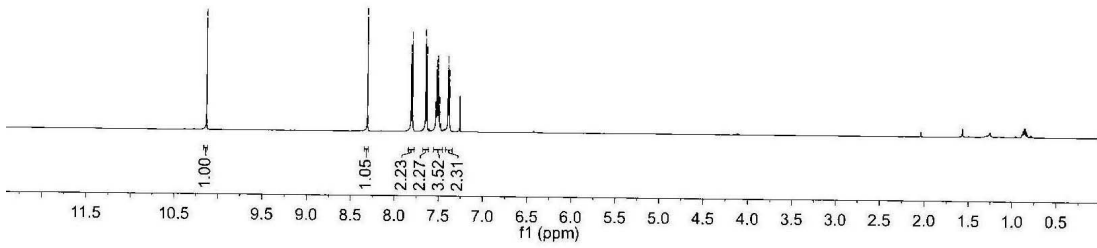

2013-5-15-Vol1  
13C NMR (cdCl3) 36 (300°K)  
2013-05-13

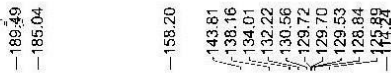

2013-5-15-Vol1  
13C NMR (cdCl3) 36 (300°K)  
2013-05-13

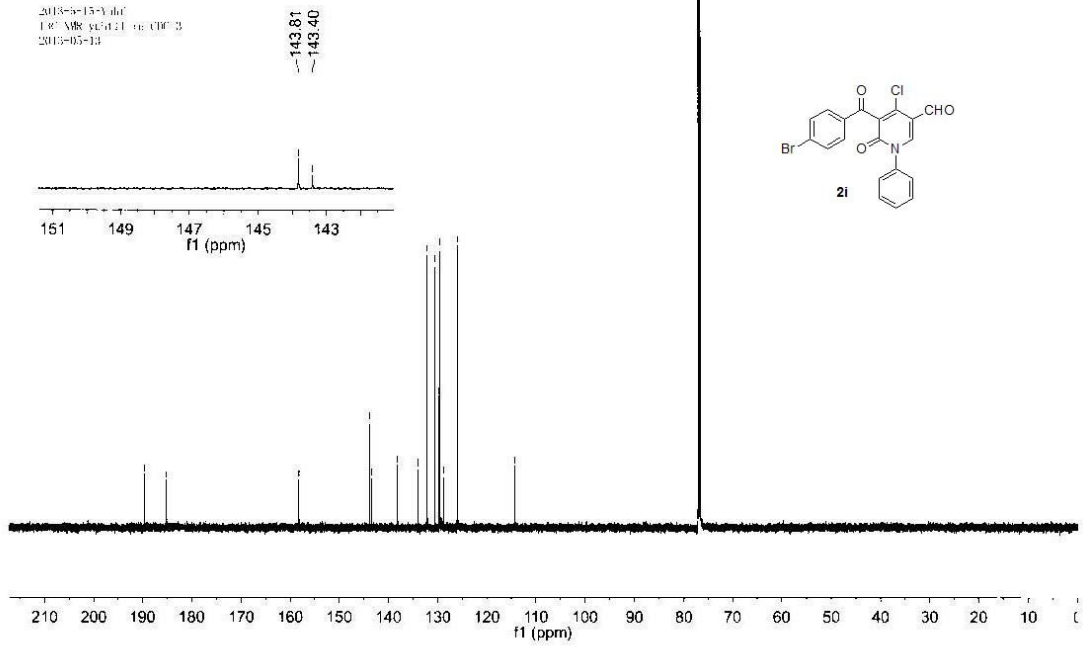

2013-5-15-Yuhf  
 1H NMR yuhf8 in CDCl3  
 2013-05-13

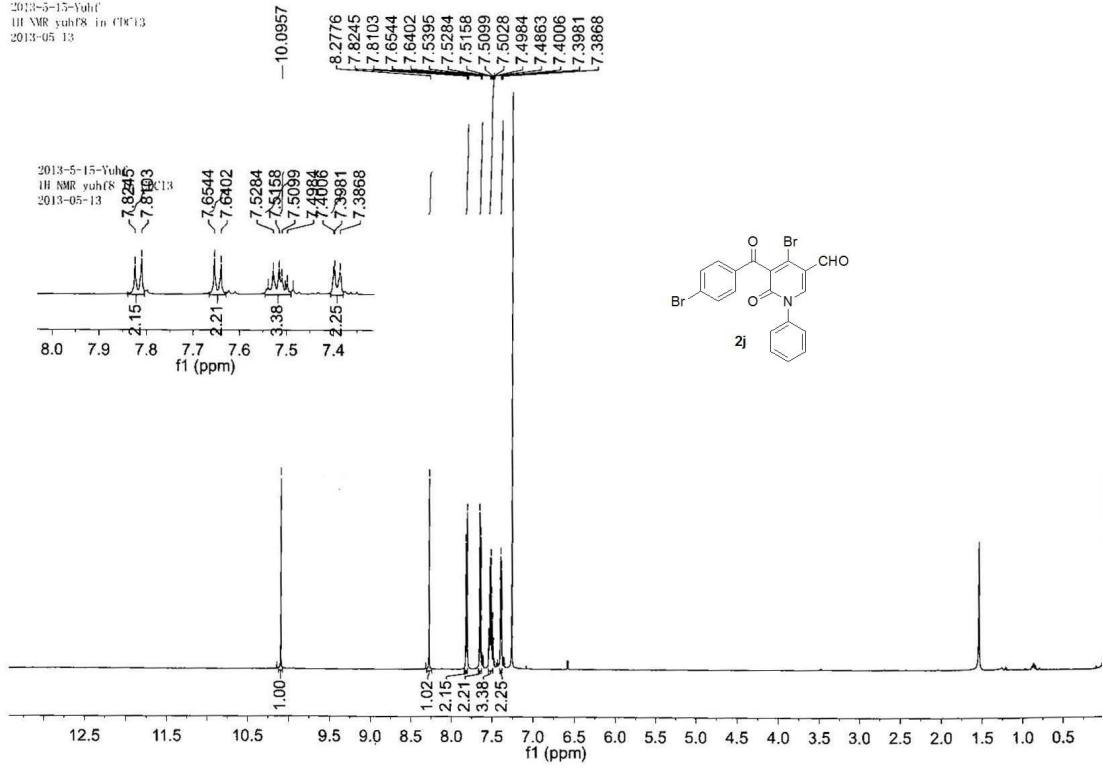

2013-5-15-Yuhf  
 13C NMR yuhf8 in CDCl3  
 2013-05-13

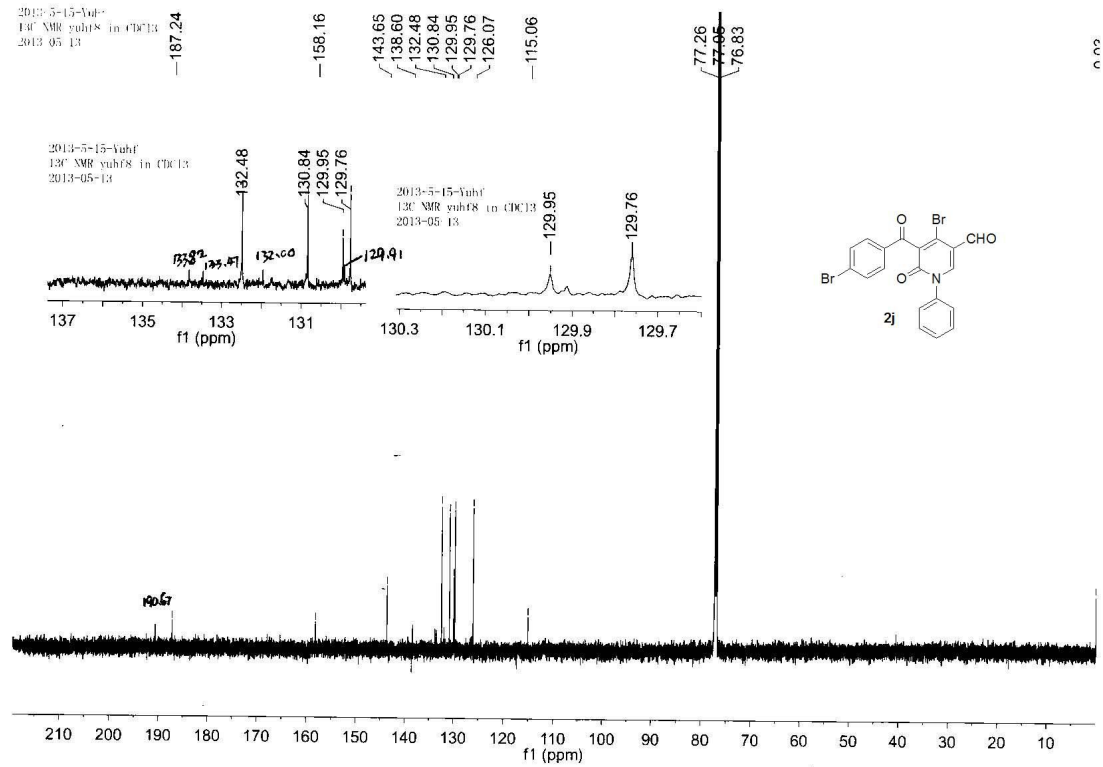

yul-20  
 1H NMR yu11 in CDCl3  
 2013-07-29

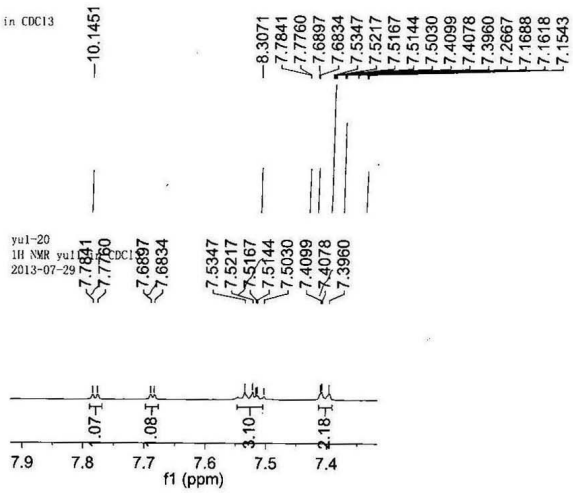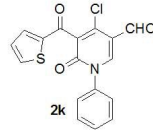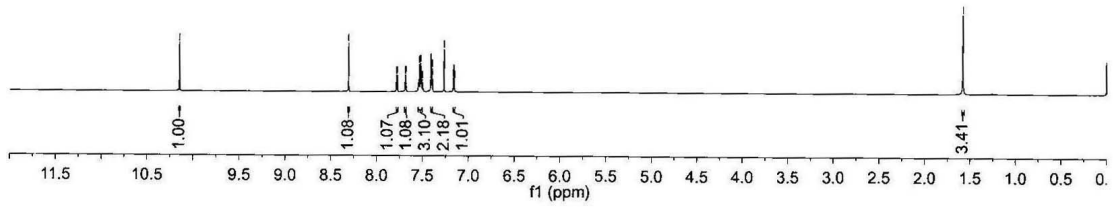

yul-20  
 13C NMR yu11 in CDCl3  
 2013-07-29

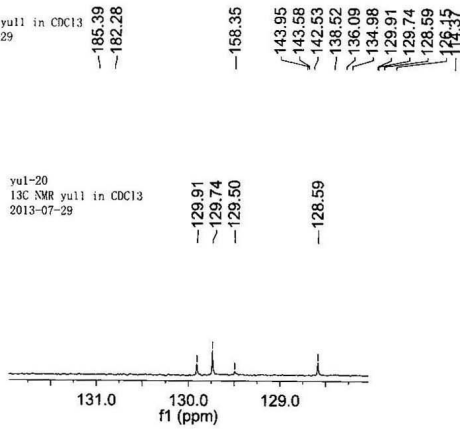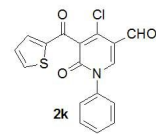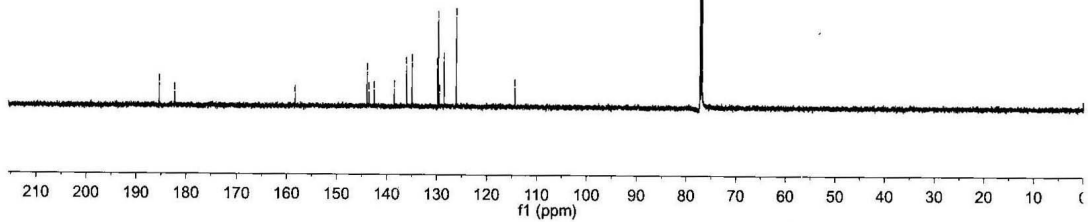

yul-20  
 1H NMR yul12 in CDCl3  
 2013-07-29

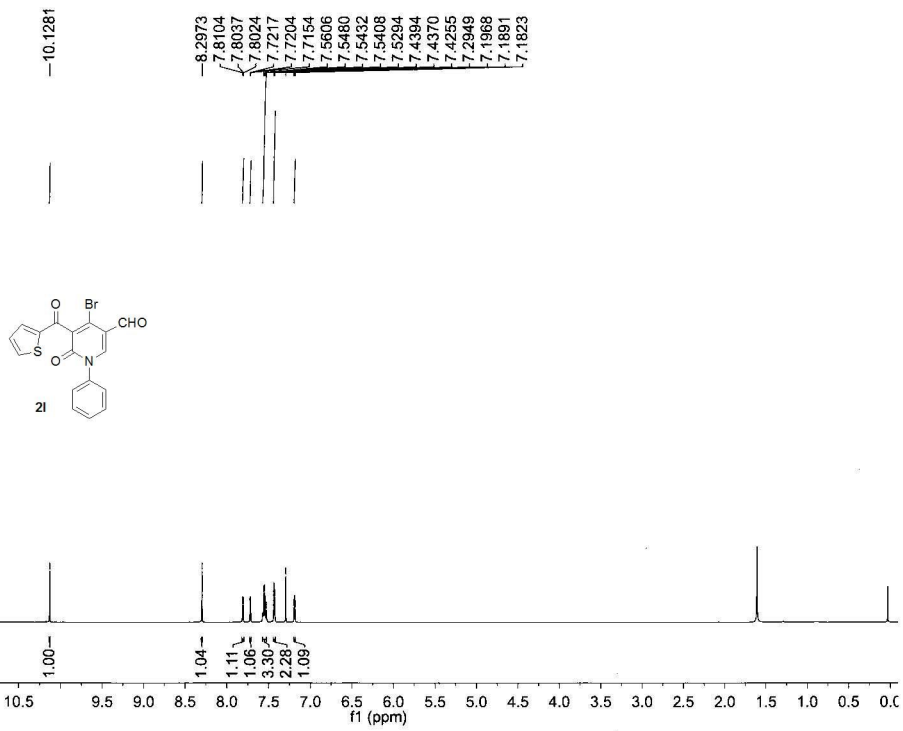

yul-20  
 13C NMR yul12 in CDCl3  
 2013-07-29

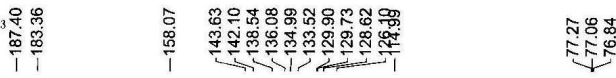

yul-20  
 13C NMR yul12 in CDCl3  
 2013-07-29

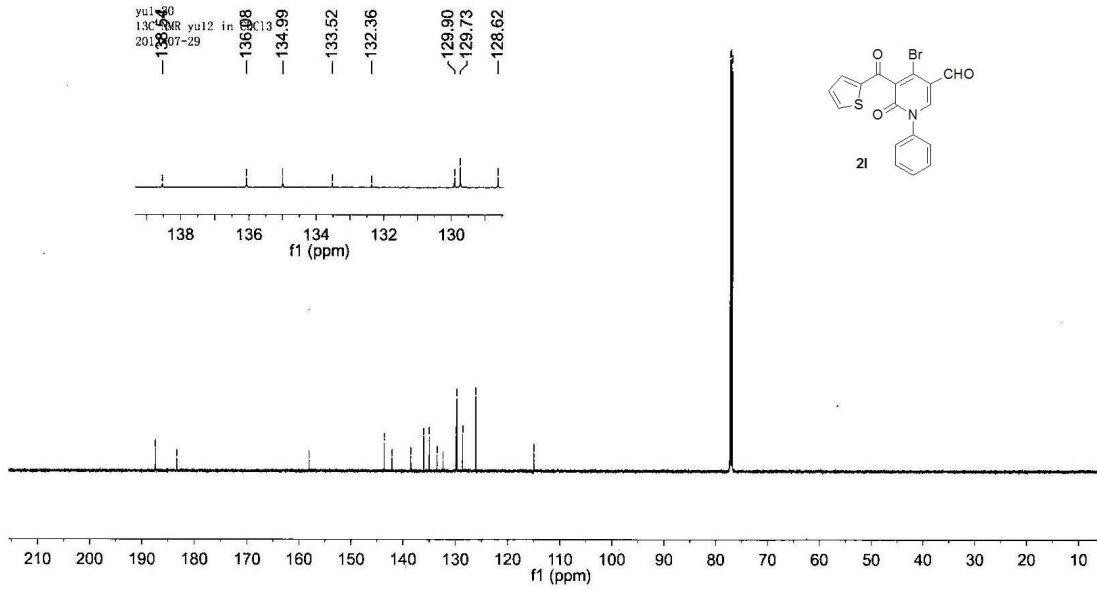

2013-5-15-Yuhf  
 1H NMR yuhf10 in CDCl3  
 2013-05-13

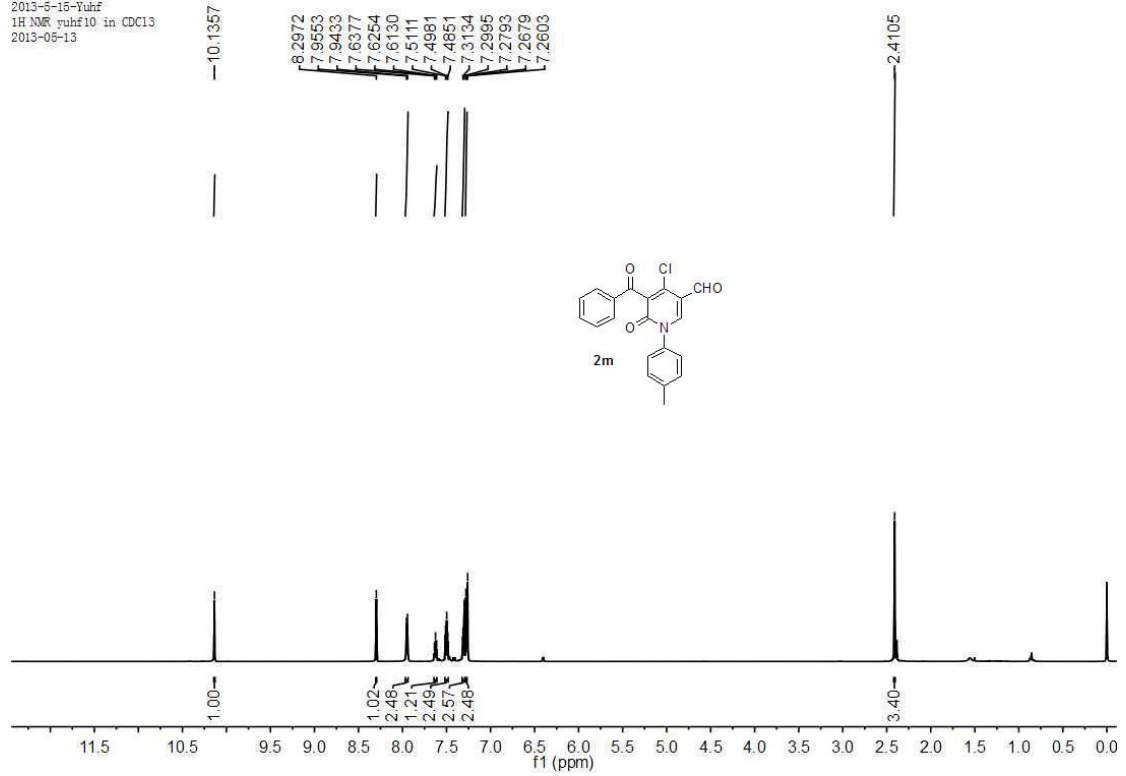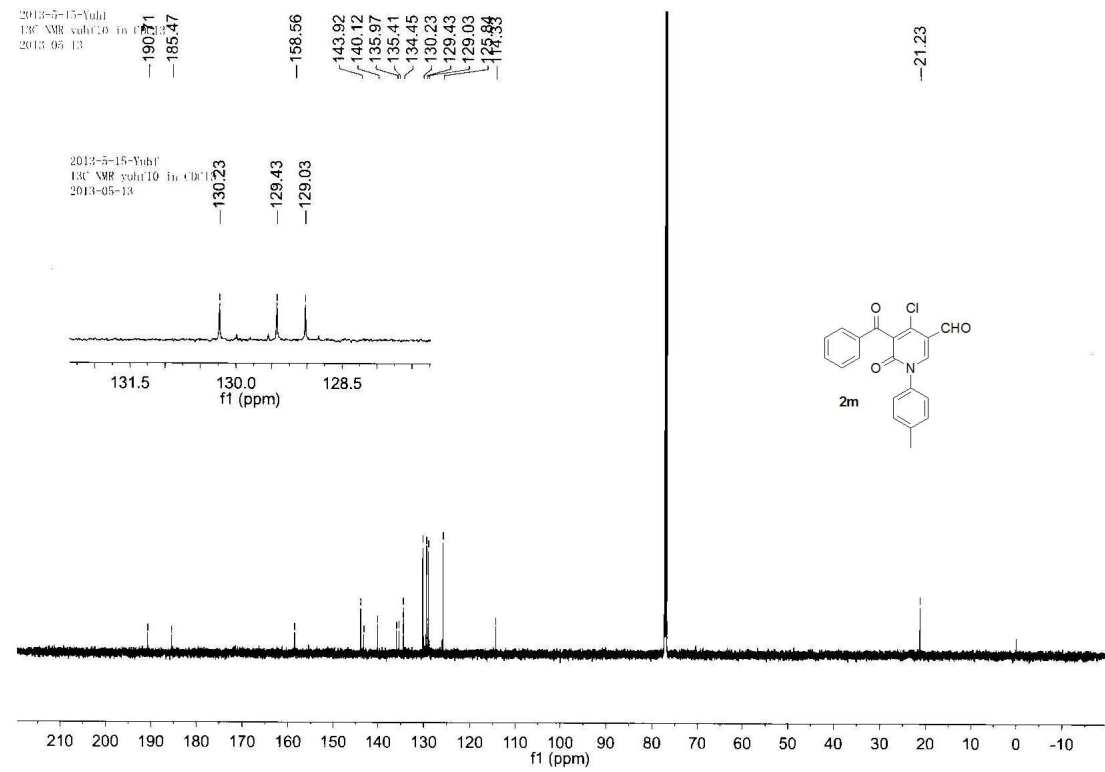





yul-20  
 1H NMR yul15 in CDCl3  
 2013-07-30

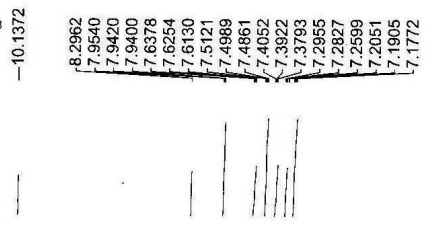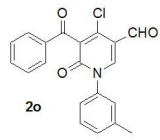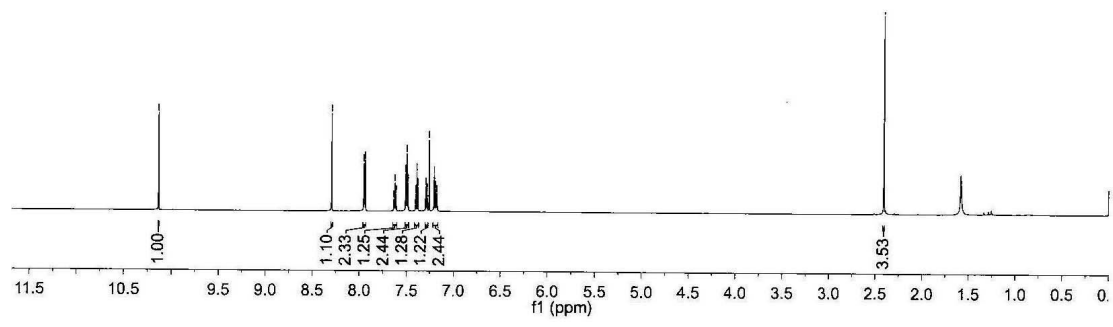

yul-20  
 13C NMR yul15 in CDCl3  
 2013-07-30

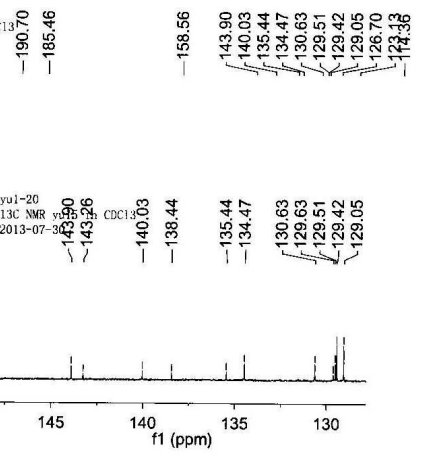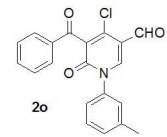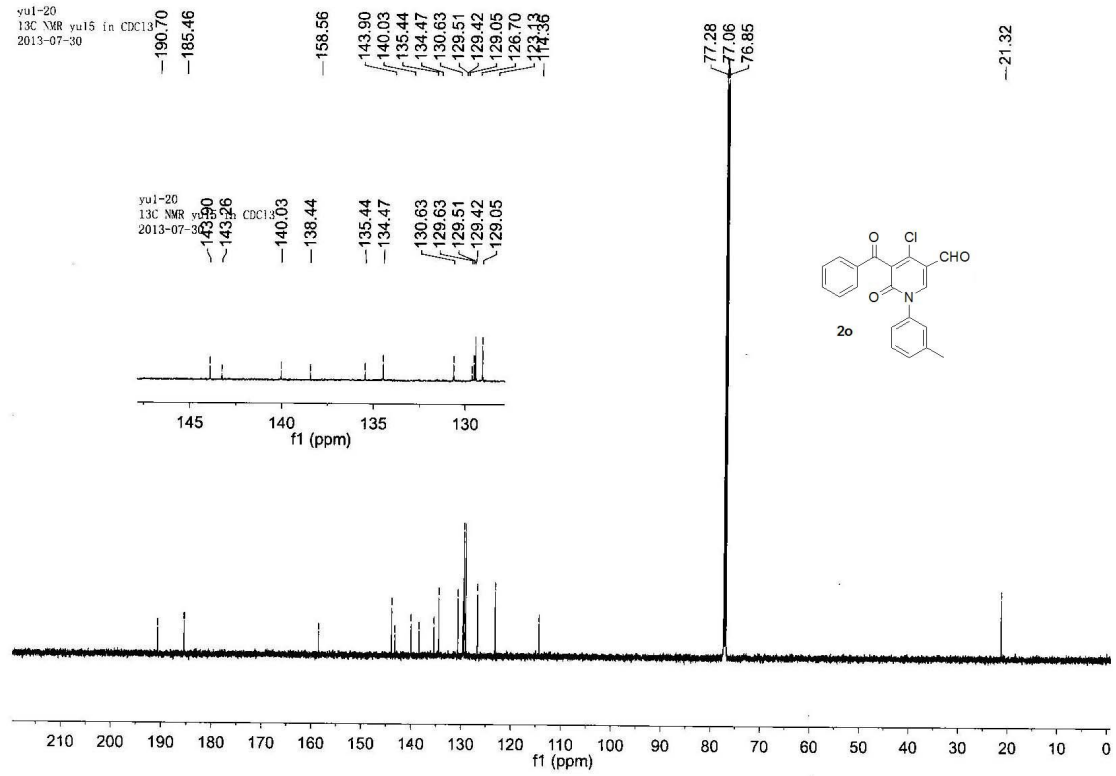

yu1-20  
 1H NMR yu16 in CDCl3  
 2013-07-30

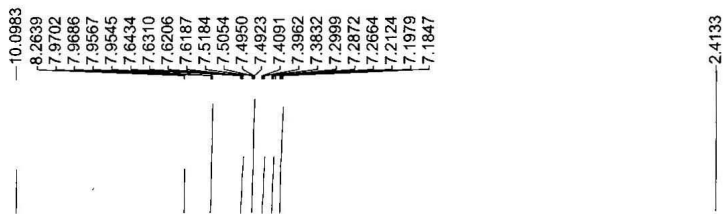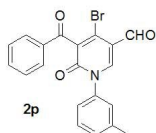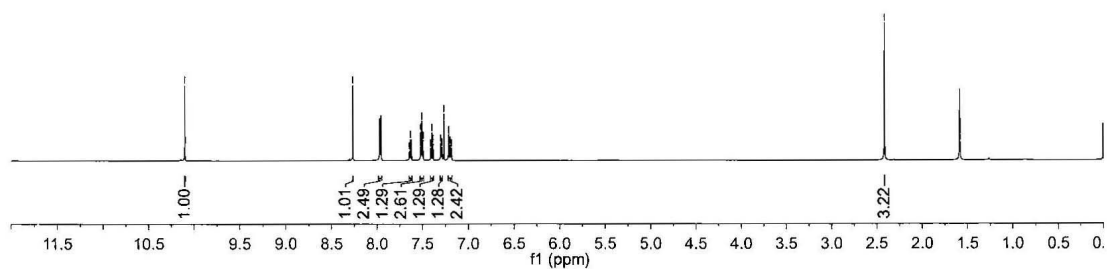

yu1-20  
 13C NMR yu16 in CDCl3  
 2013-07-30

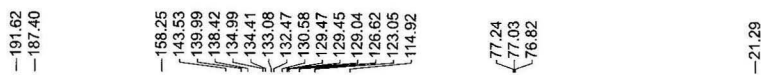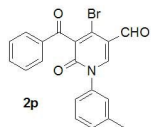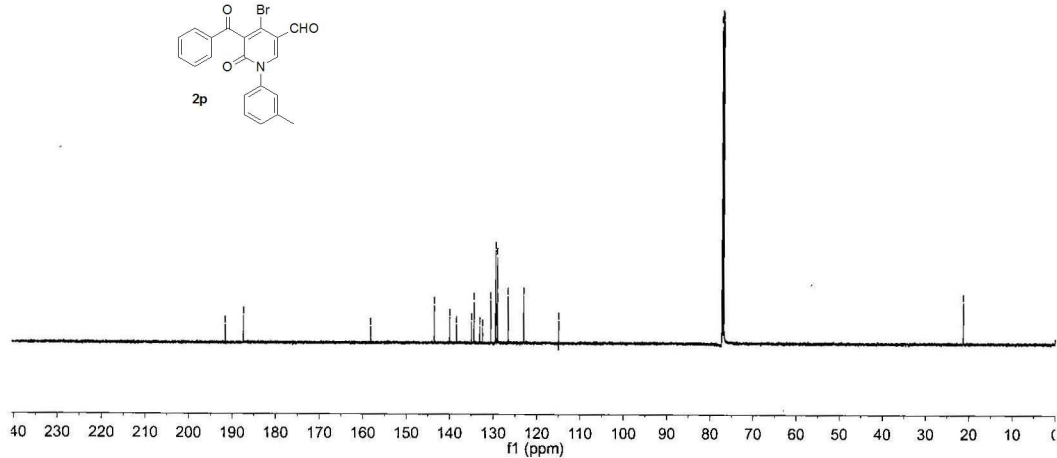

yul-20  
 1H NMR yul17 in CDCl3  
 2013-07-30

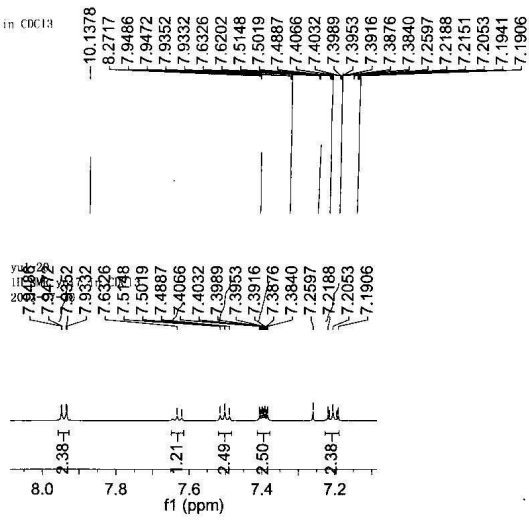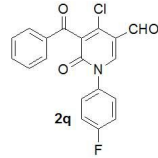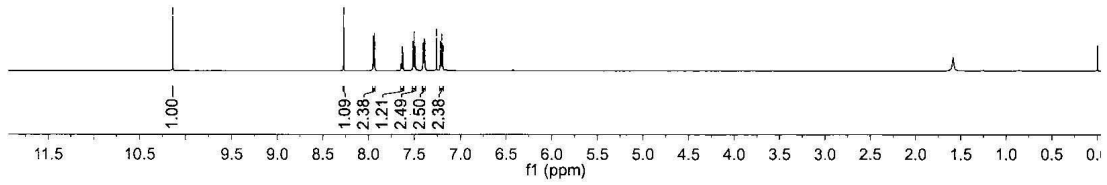

yul-20  
 13C NMR yul17 in CDCl3  
 2013-07-30

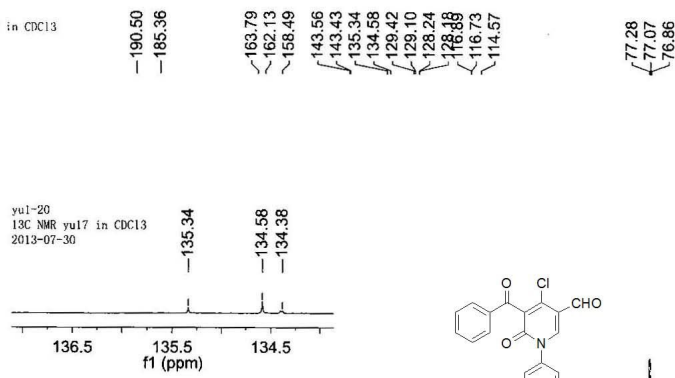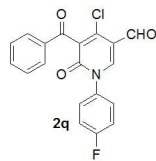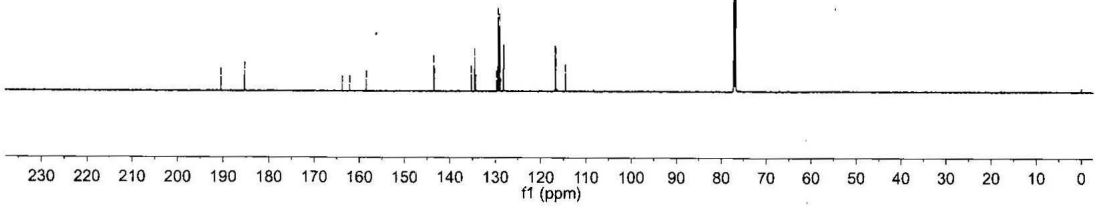

YUHF1  
1H NMR IN CDCl3

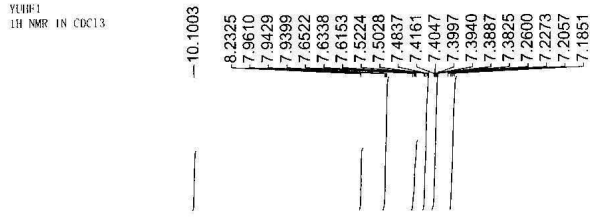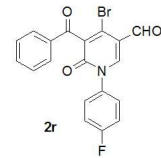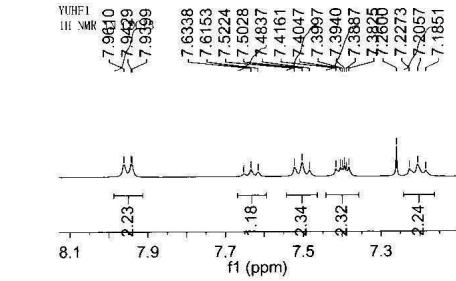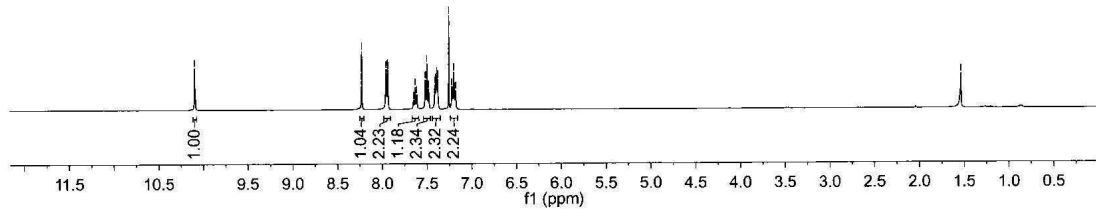

YUHF1  
13C NMR IN CDCl3

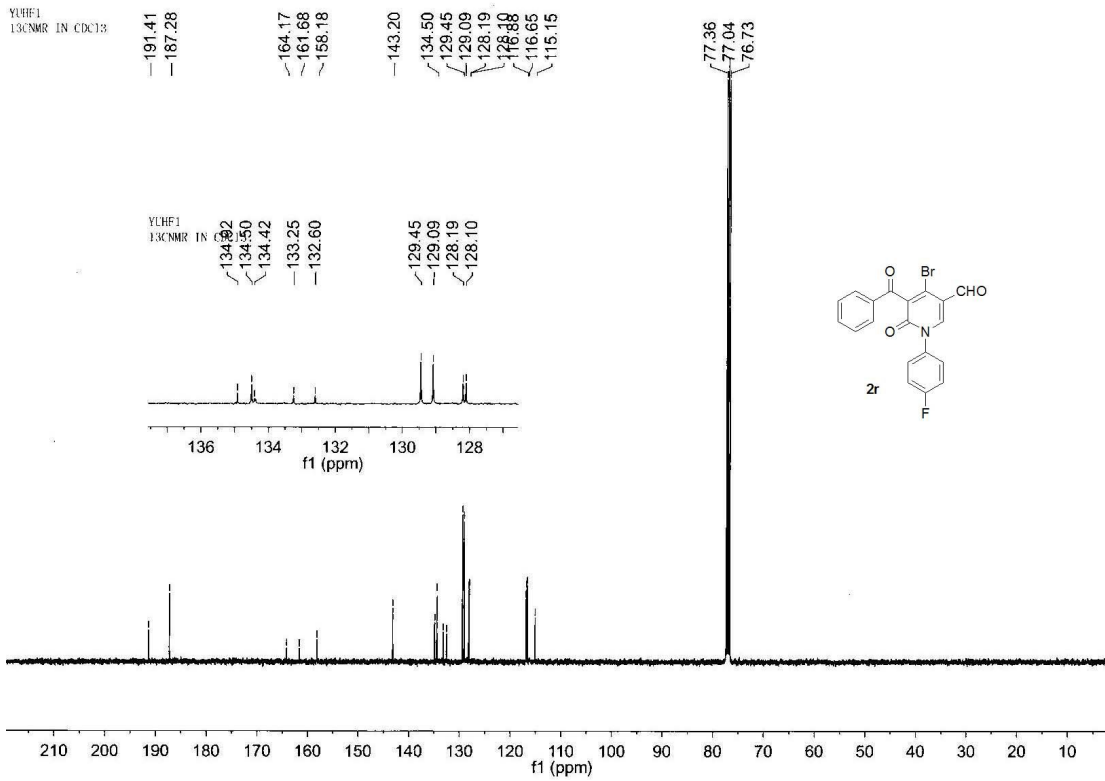

yul-20  
 1H NMR yu19 in CDCl3  
 2013-07-30

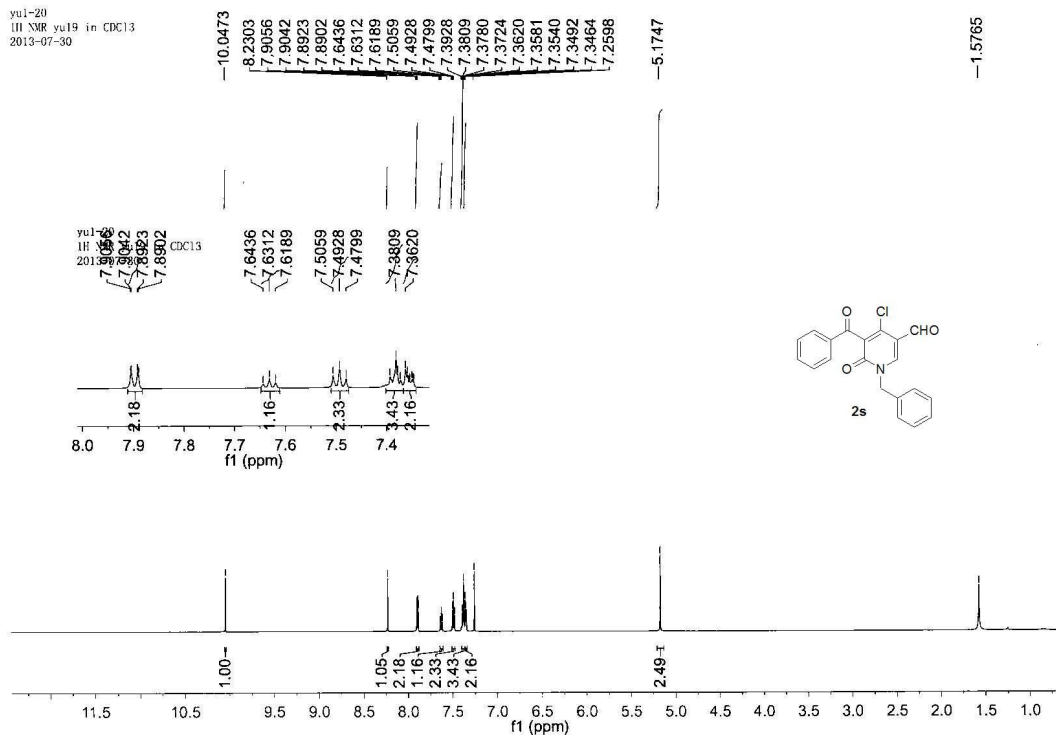

yul-20  
 13C NMR yu19 in CDCl3  
 2013-07-30

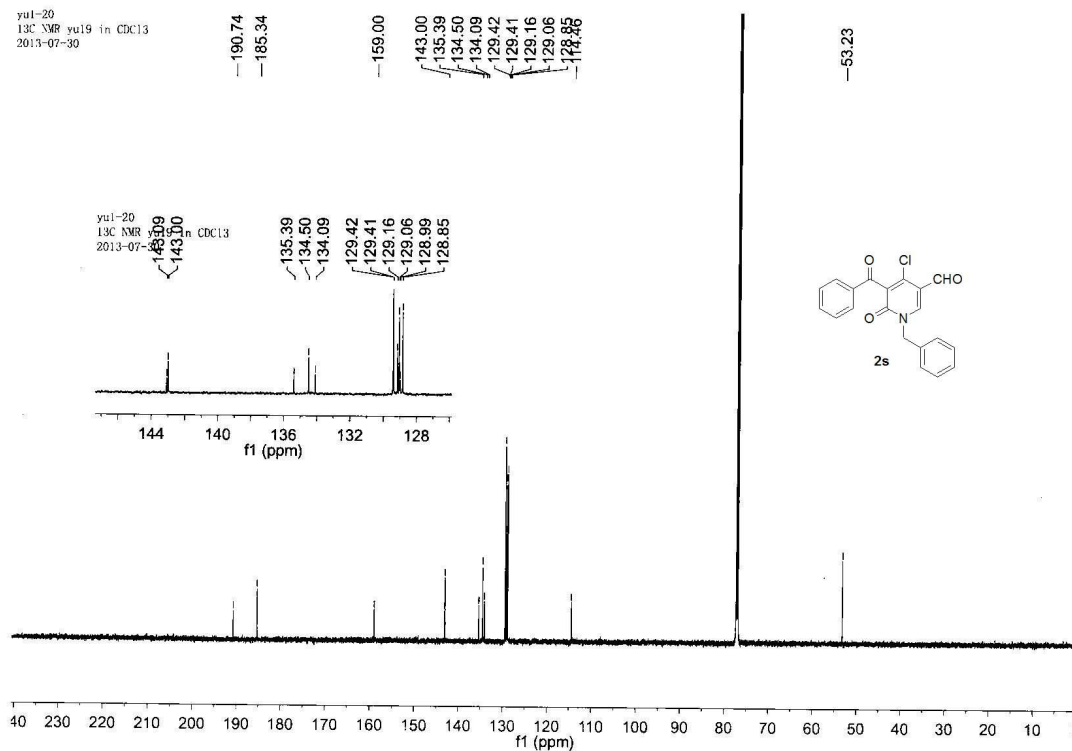

yu1-20  
1H NMR yu20 in CDCl3  
2013-07-30

9.9971  
8.1957  
7.9116  
7.8995  
7.6299  
7.6175  
7.5049  
7.4919  
7.4819  
7.4789  
7.3885  
7.3768  
7.3684  
7.3602  
7.3563  
7.3475  
7.2597  
5.1633  
1.5865

yu1-20  
1H NMR yu20 in CDCl3  
2013-07-30

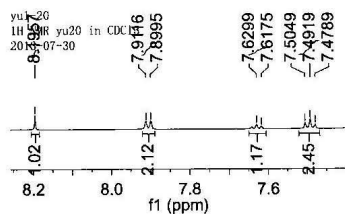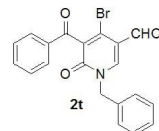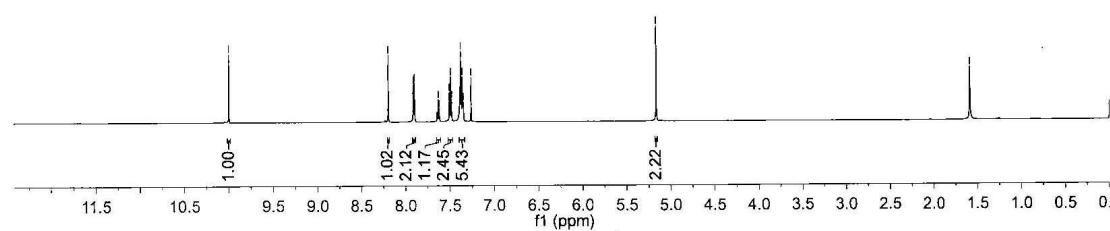

yu1-20  
13C NMR yu20 in CDCl3  
2013-07-30

191.69  
187.33  
158.74  
142.74  
134.97  
134.47  
134.07  
132.94  
129.47  
129.41  
129.15  
129.09  
128.84  
128.07  
128.07  
77.27  
77.06  
76.85  
53.26

yu1-20  
13C NMR yu20 in CDCl3  
2013-07-30

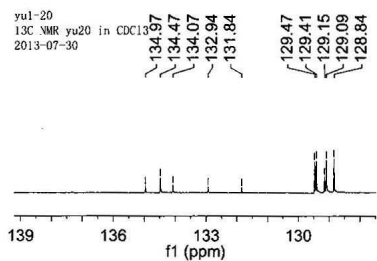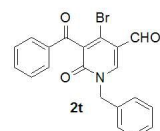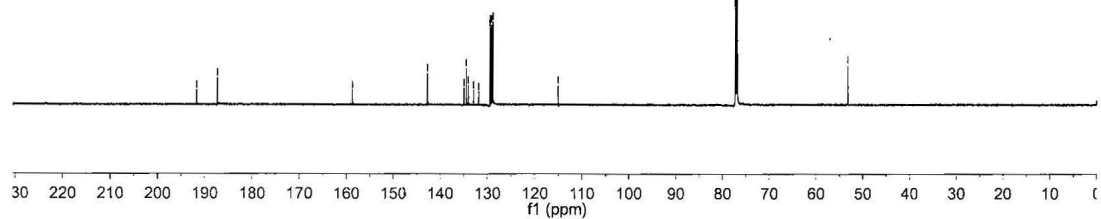

yu1-20  
 1H NMR yu13 in CDCl3  
 2013-07-29

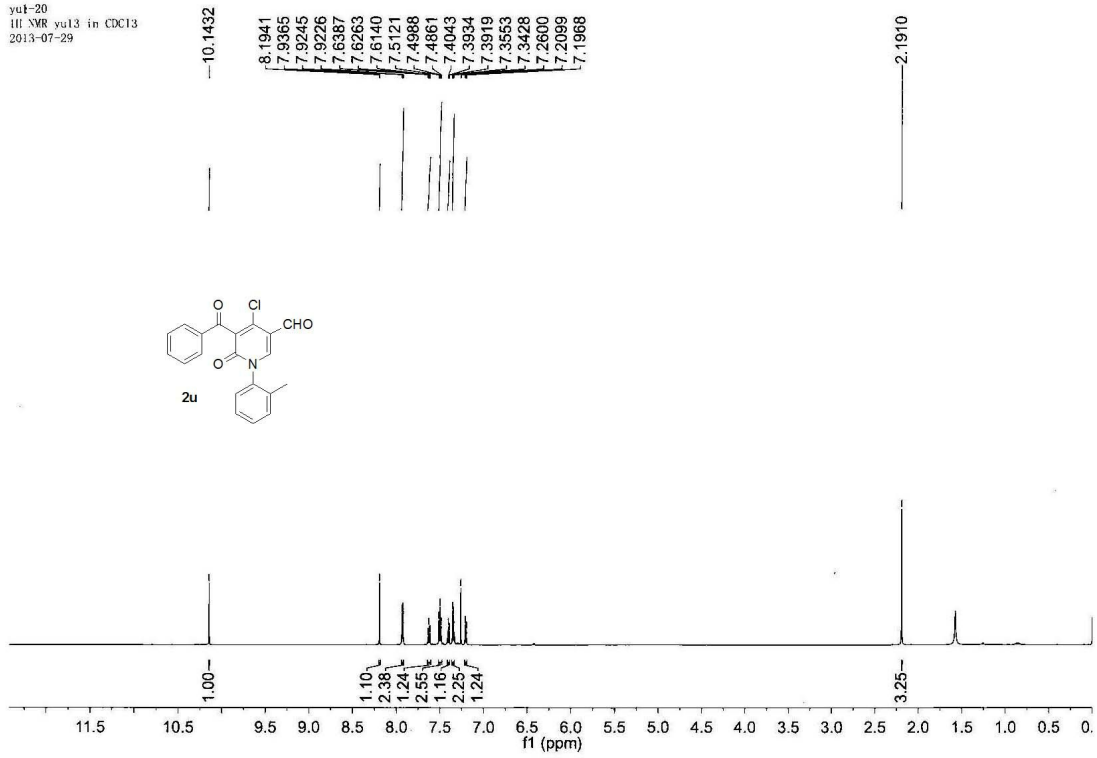

yu1-20  
 13C NMR yu13 in CDCl3  
 2013-07-29

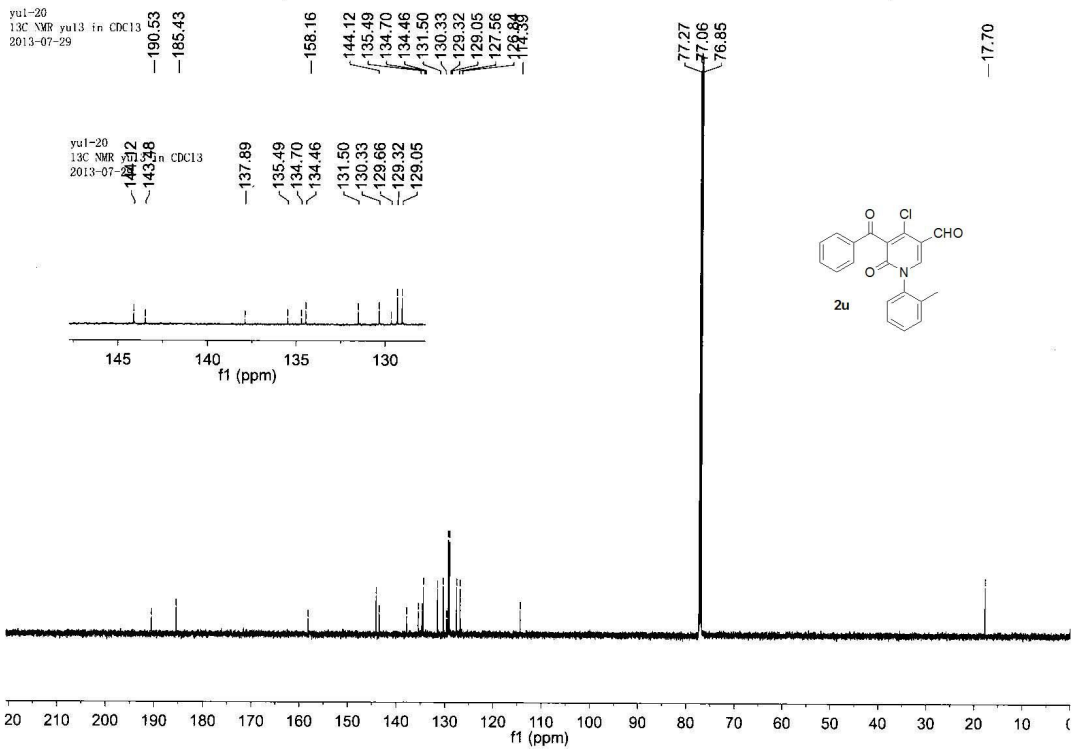



yu1-20  
 1H NMR yu14 in CDCl3  
 2013-07-29

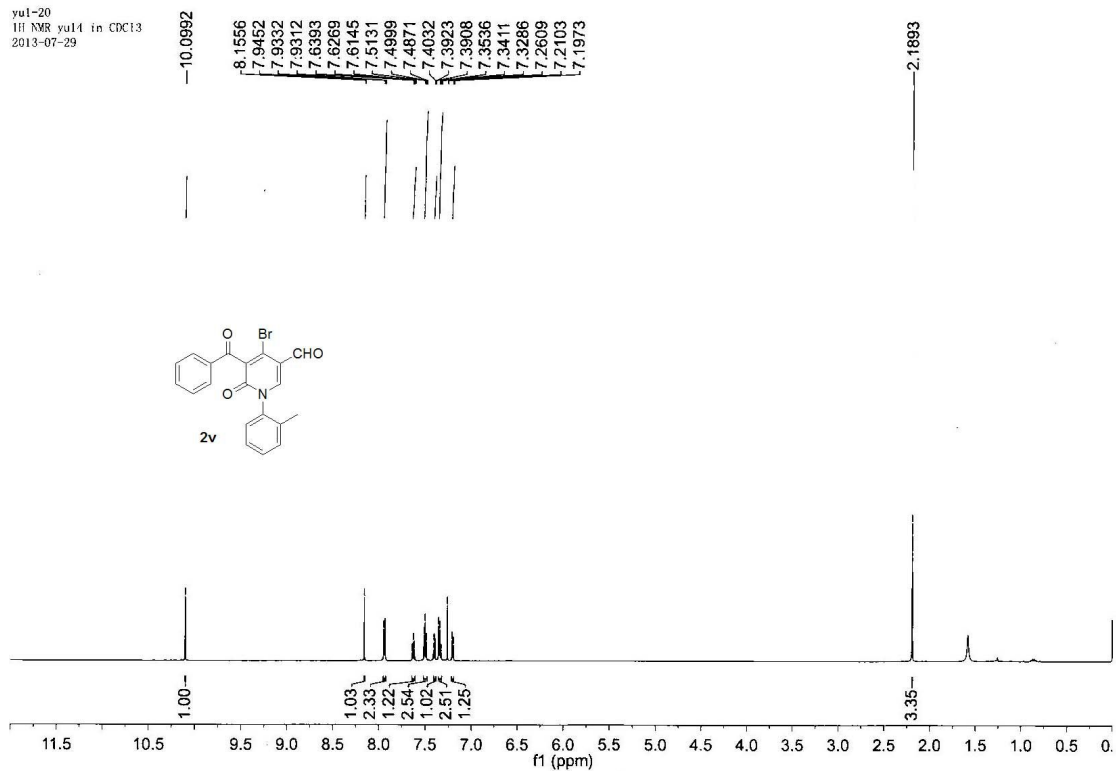

yu1-20  
 13C NMR yu14 in CDCl3  
 2013-07-29

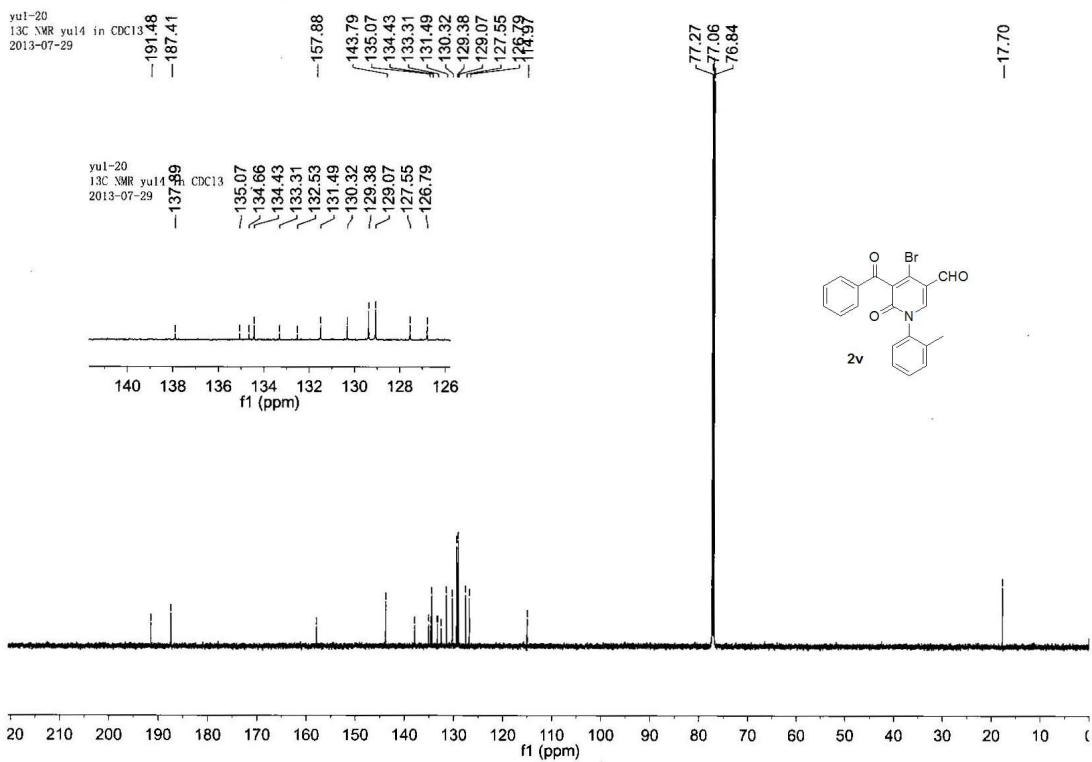

yhf56  
1H NMR yhf56 in CDCl3

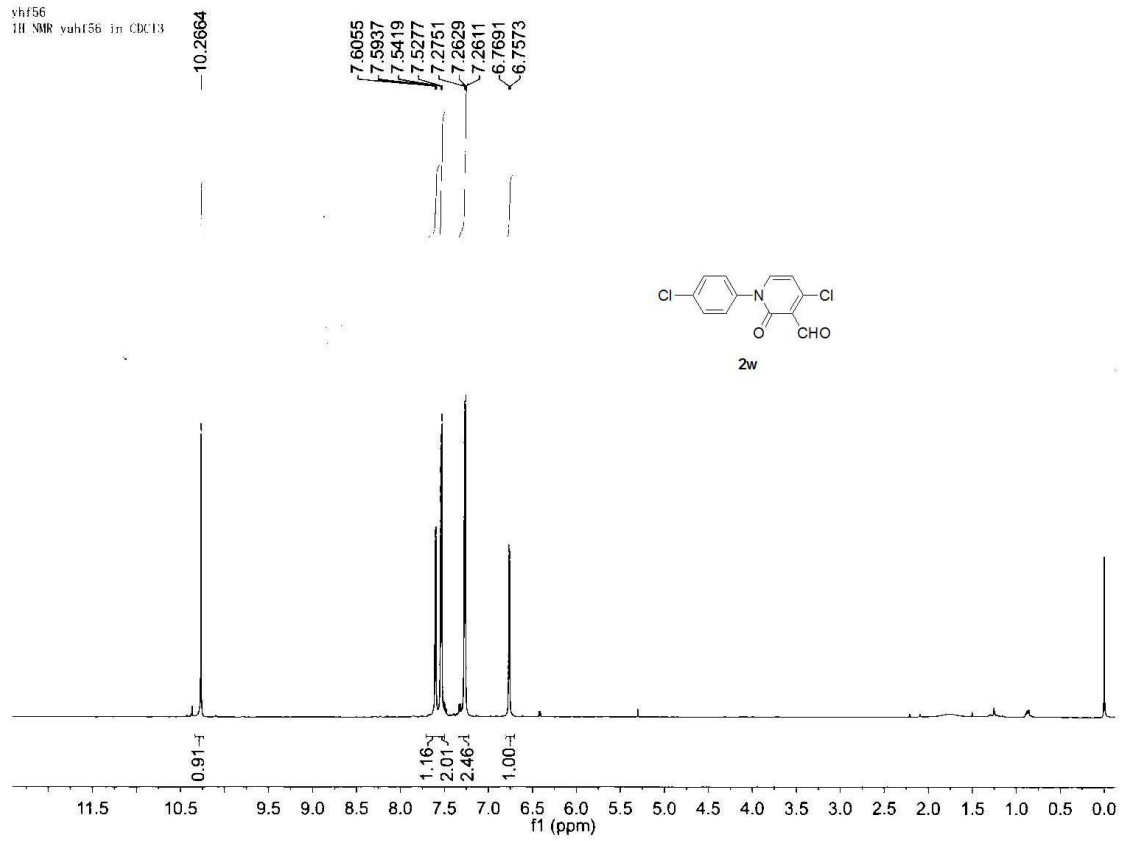

yhf56  
13C NMR yhf56 in CDCl3

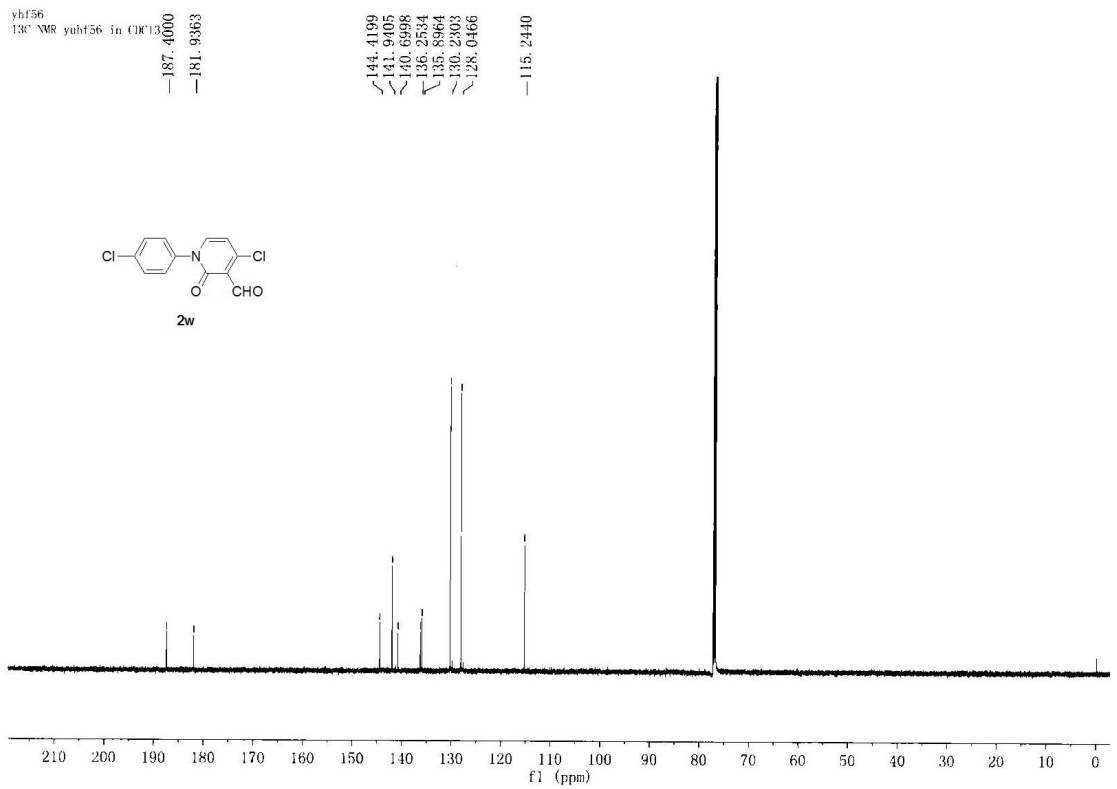

Supplement: c4ra16924g1.pdf [file c4ra16924g1.pdf]
